# Supplementary material for: Seven coordinate Co(ii) and six coordinate Ni(ii) complexes of an aromatic macrocyclic triamide ligand as paraCEST agents for MRI
Source: Royal Society of Chemistry journal article supplement (doi:10.1039/c9dt00747d), 2019-01-01
Supplement: c9dt00747d1.pdf [file c9dt00747d1.pdf]

## Supporting Information

### Seven Coordinate Co(II) and Six Coordinate Ni(II) Complexes of Aromatic Macrocyclic Triamide Ligand as ParaCEST Agents for MRI

Rabindra N. Pradhan,<sup>a</sup> Subhayan Chakraborty,<sup>b</sup> Pratibha Bharti,<sup>c</sup> Janesh Kumar,<sup>c</sup> Arindam Ghosh,<sup>\*b</sup> and Akhilesh K. Singh<sup>\*a</sup>

<sup>a</sup>School of Basic Sciences, Indian Institute of Technology Bhubaneswar, Bhubaneswar, 752050 (India), E-mail: [aksingh@iitbbs.ac.in](mailto:aksingh@iitbbs.ac.in)

<sup>b</sup>School of Chemical Sciences, National Institute of Science Education and Research Bhubaneswar, 752050 (India), E-mail: [aringh@niser.ac.in](mailto:aringh@niser.ac.in)

<sup>c</sup>National Centre for Cell Science, NCCS Complex, Pune University Campus, Ganeshkhind, Pune- 411 007 (India)

### NMR Spectra of the compounds

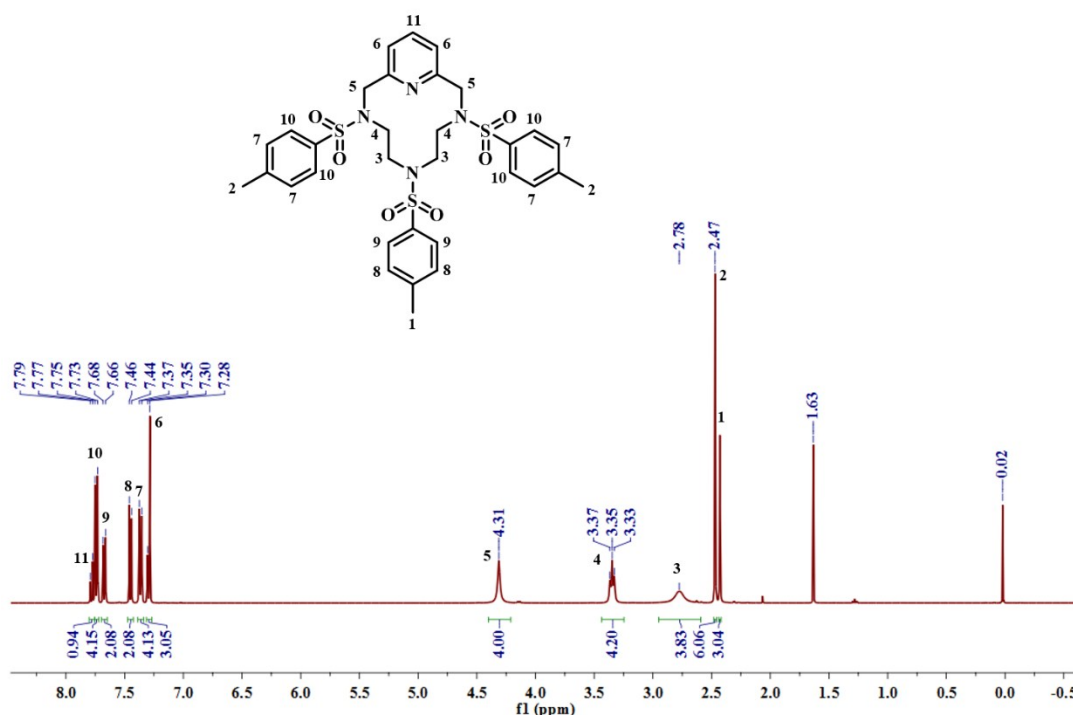

**Fig. S1** <sup>1</sup>H NMR spectrum of compound **2** in CDCl<sub>3</sub>

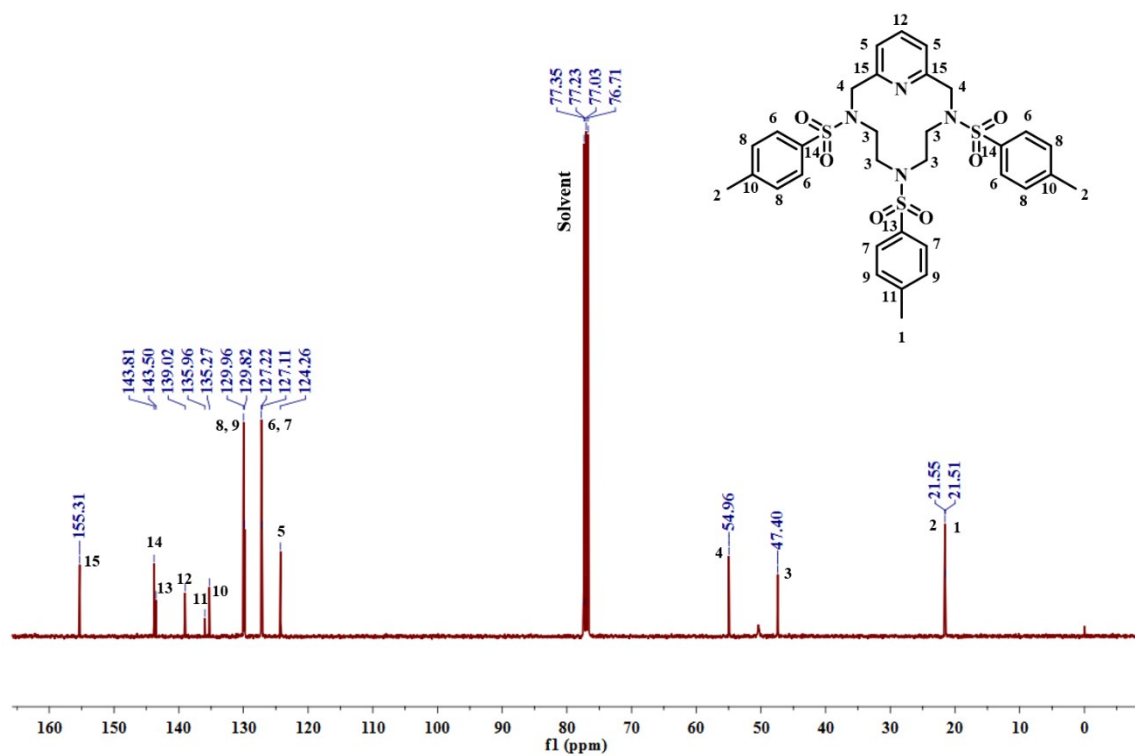

**Fig. S2** <sup>13</sup>C NMR spectrum of compound **2** in CDCl<sub>3</sub>

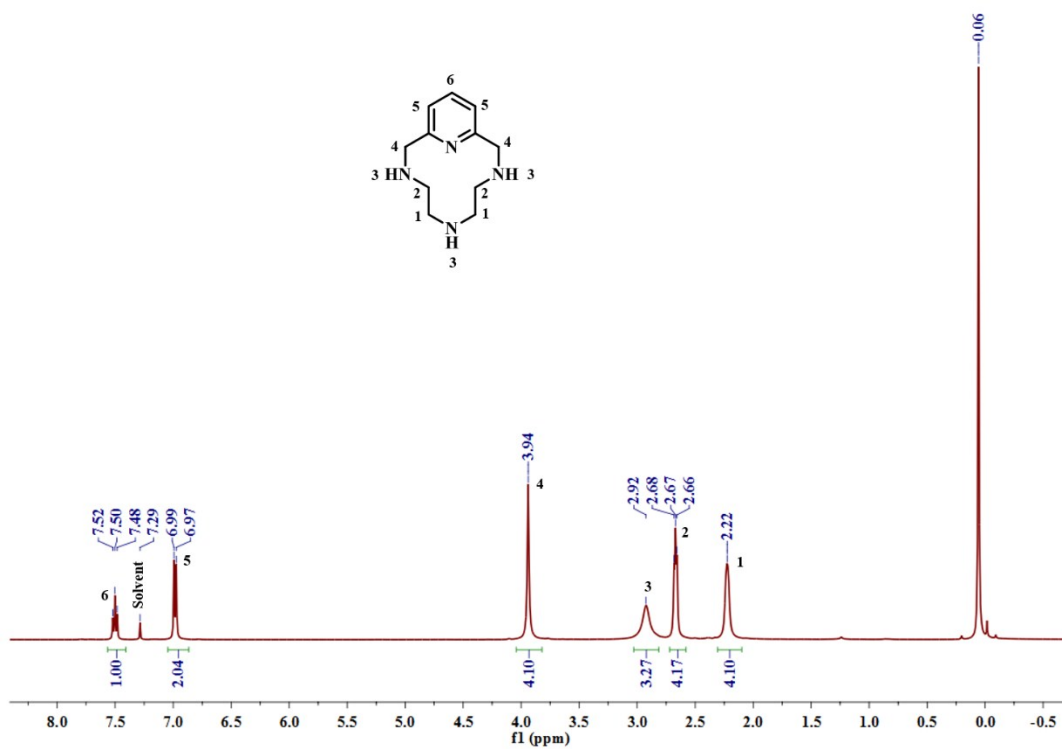

**Fig. S3** <sup>1</sup>H NMR spectrum of compound **3** in CDCl<sub>3</sub>

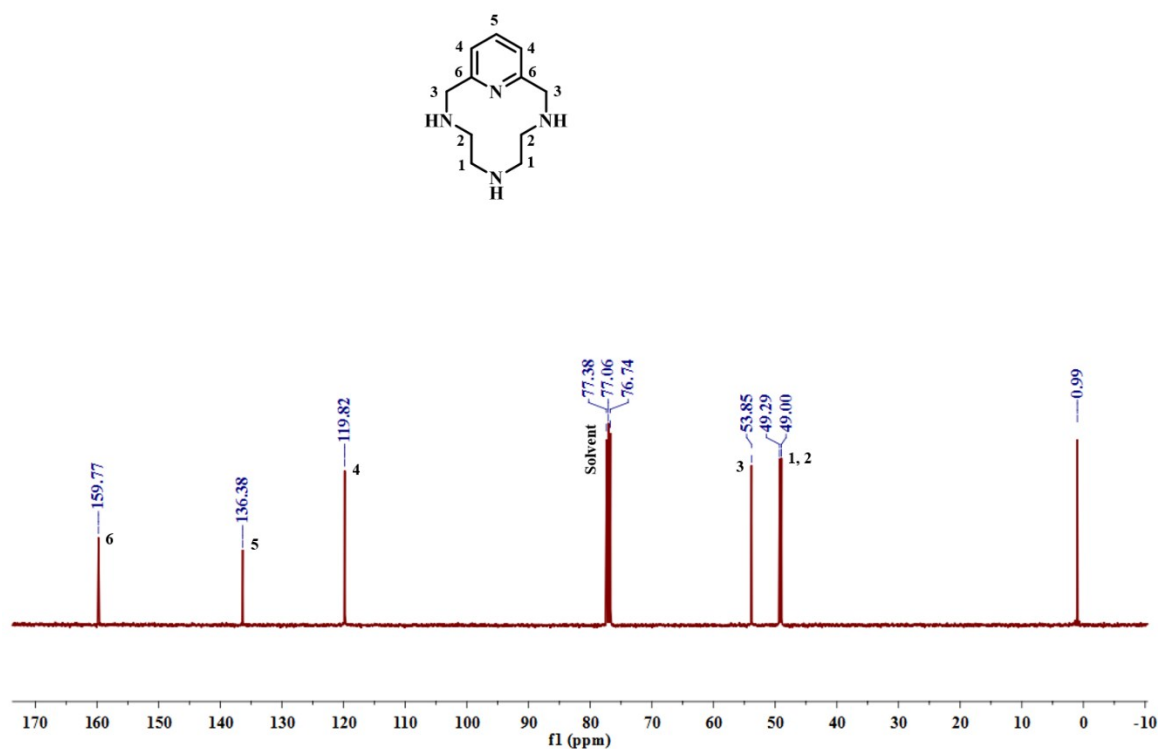

**Fig. S4**  $^{13}\text{C}$  NMR spectrum of compound **3** in  $\text{CDCl}_3$

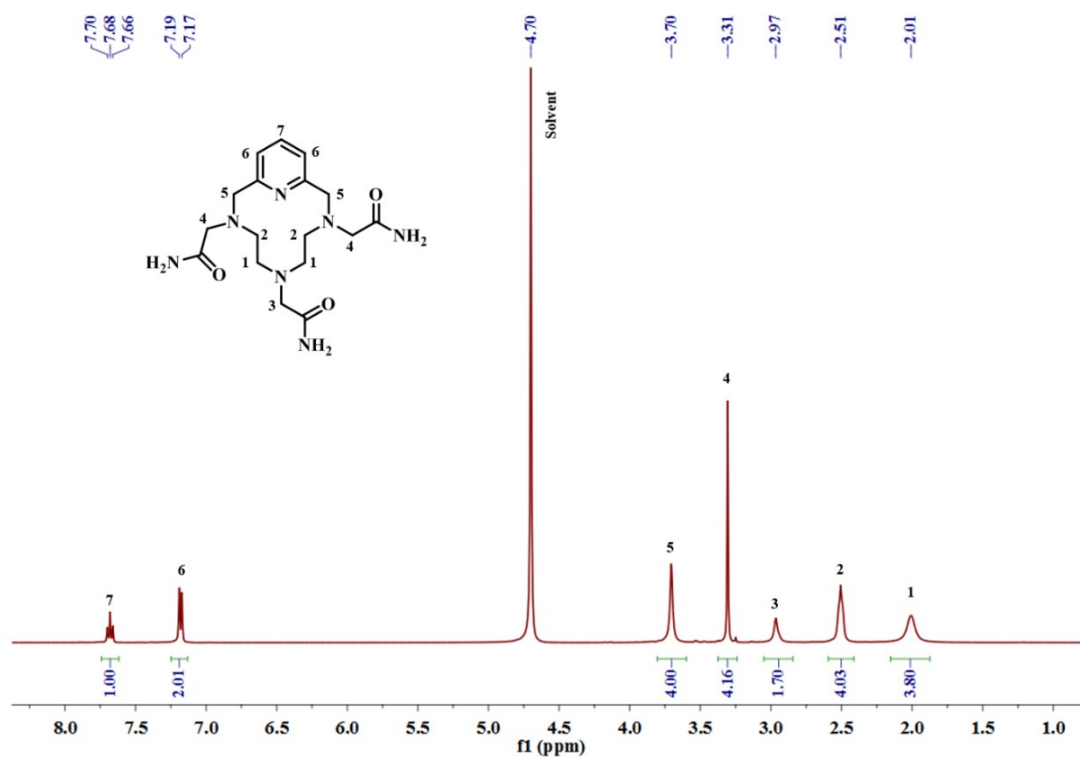

**Fig. S5**  $^1\text{H}$  NMR spectrum of ligand **TPTA** in  $\text{D}_2\text{O}$ .

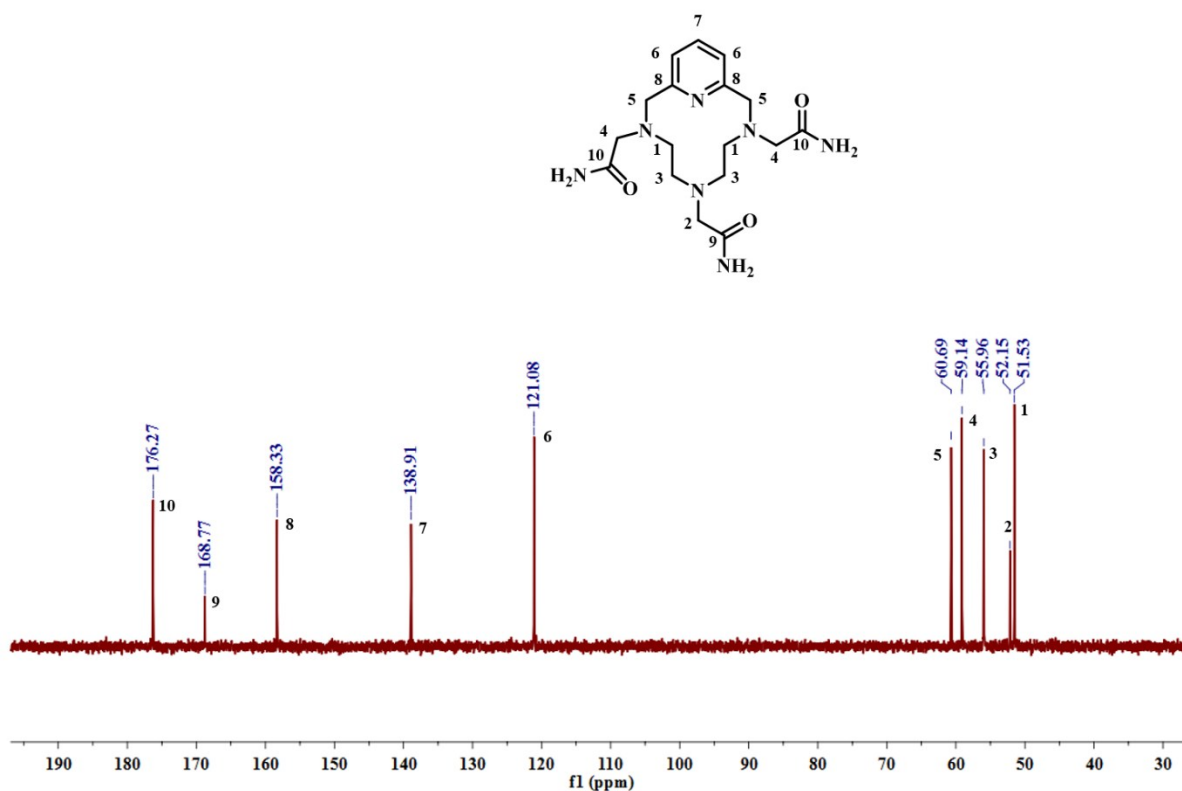

**Fig. S6**  $^{13}\text{C}$  NMR spectrum of ligand TPTA in  $\text{D}_2\text{O}$ .

## ESI-MS spectra of compounds

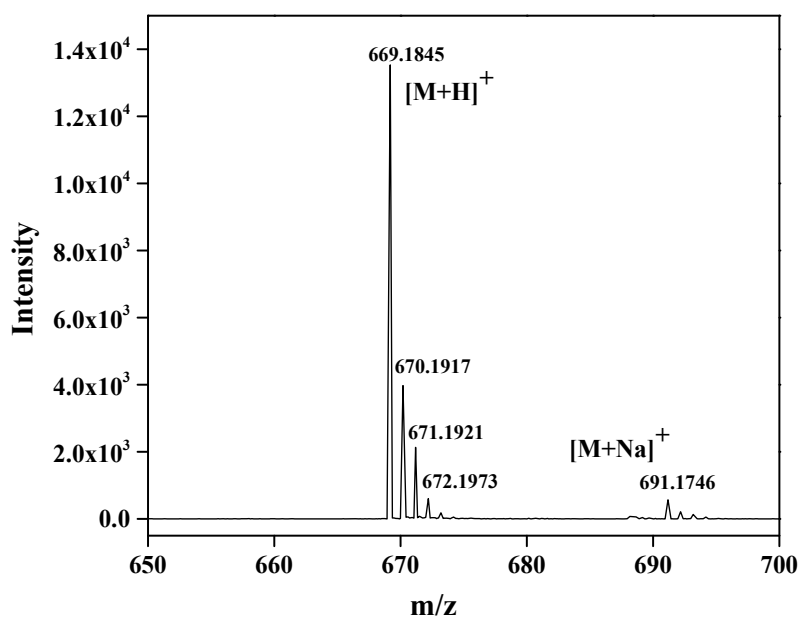

**Fig. S7** ESI-MS spectrum of compound 2.

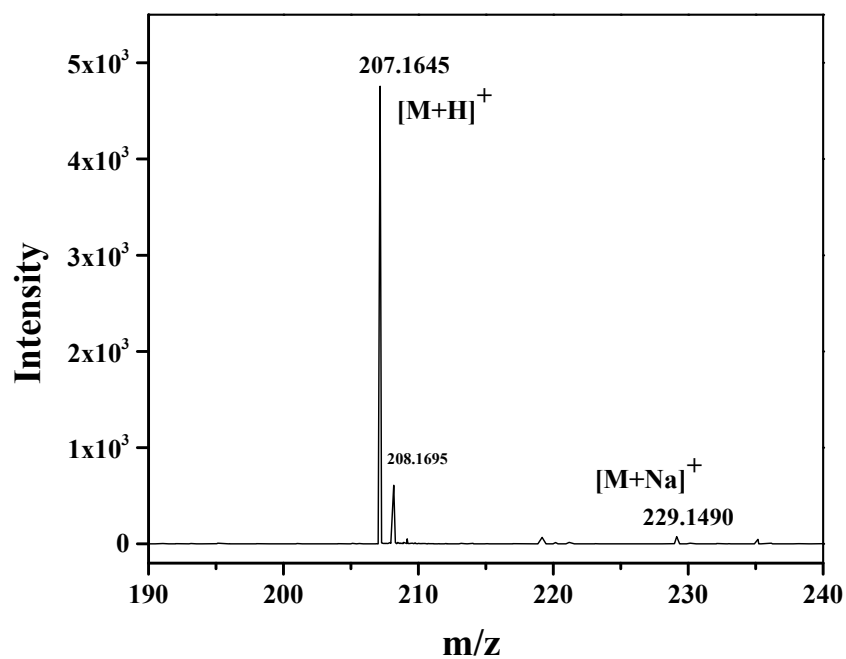

Fig. S8 ESI-MS spectrum of compound 3.

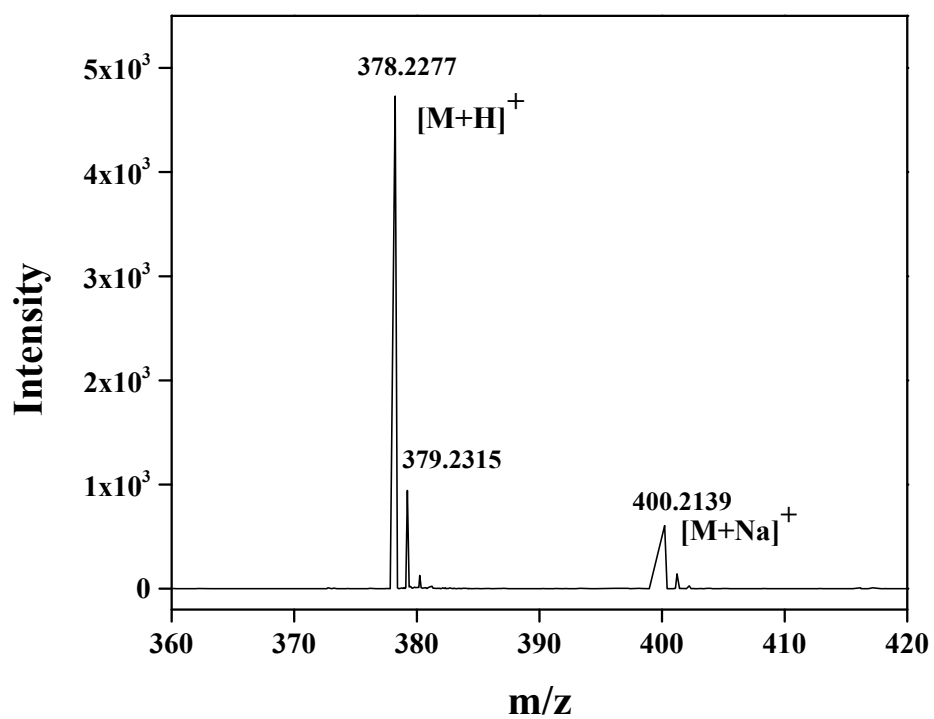

Fig. S9 ESI-MS spectrum of compound TPTA.

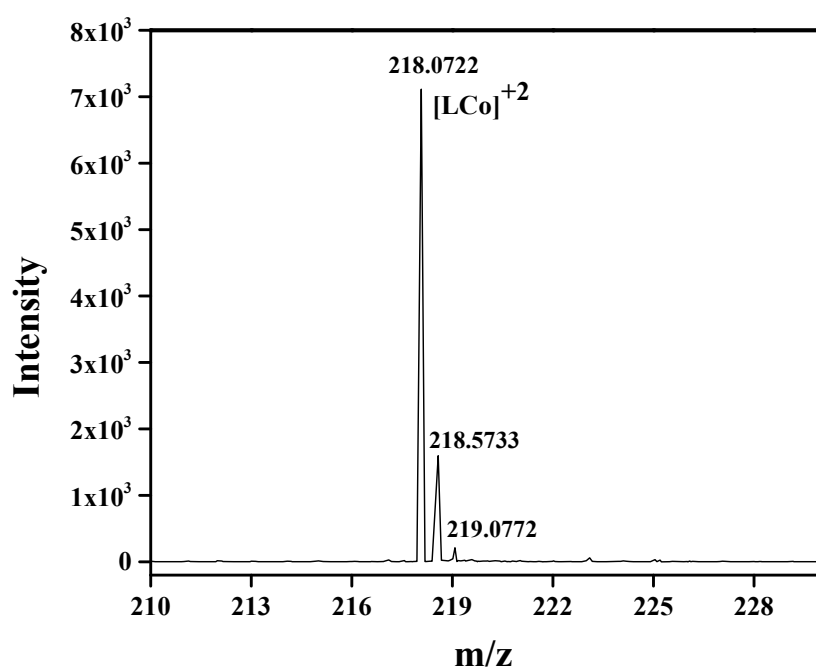

**Fig. S10** ESI-MS spectrum of complex  $[\text{Co}(\text{TPTA})]\cdot\text{Cl}_2\cdot 2\text{H}_2\text{O}$ .

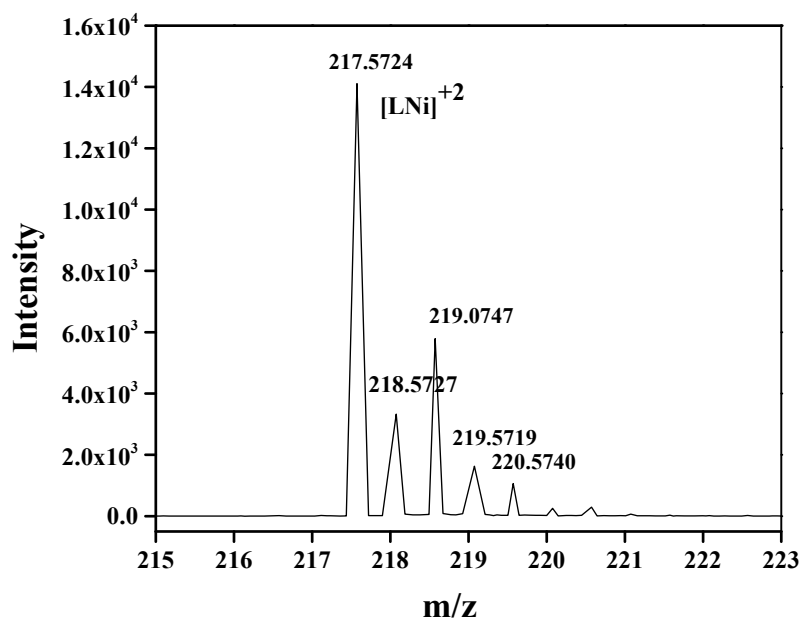

**Fig. S11** ESI-MS spectrum of complex  $[\text{Ni}(\text{TPTA})\text{Cl}]\cdot\text{Cl}\cdot 0.25\text{H}_2\text{O}$ .

## IR spectra of ligand and Complexes

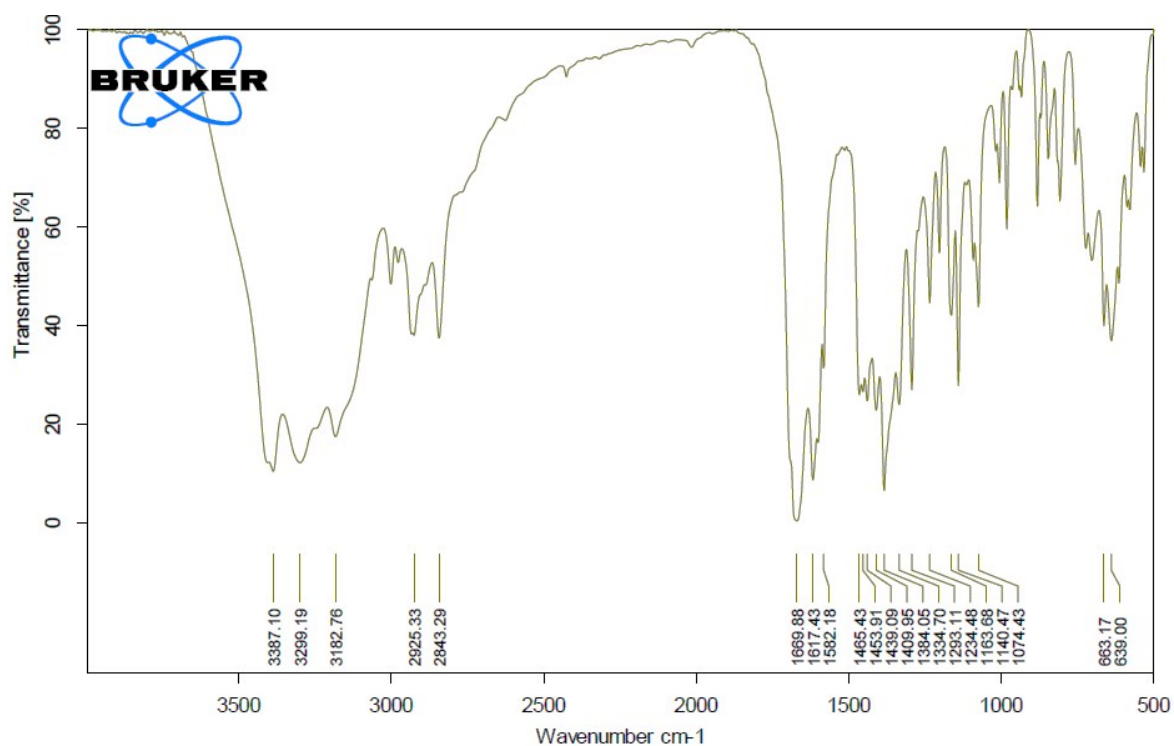

Fig. S12 FT-IR spectra of TPTA at ambient temperature.

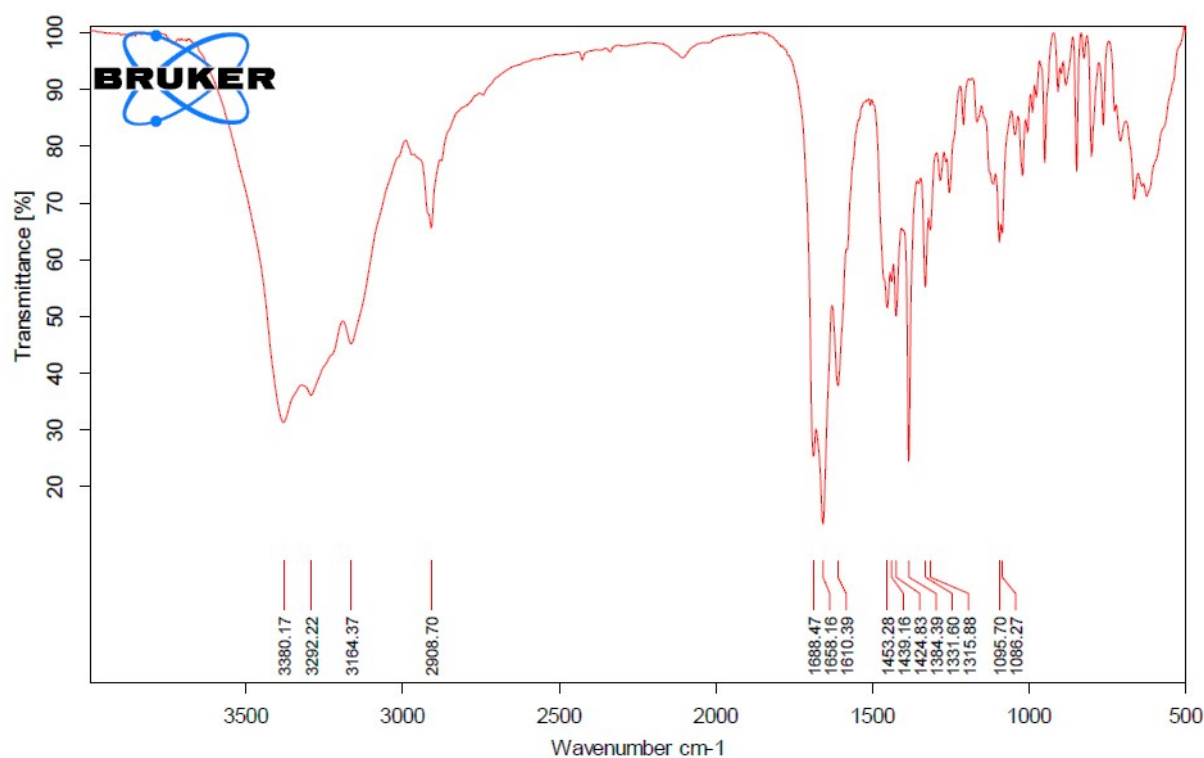

Fig. S13 FT-IR spectra of [Co(TPTA)]<sup>2+</sup> at ambient temperature.

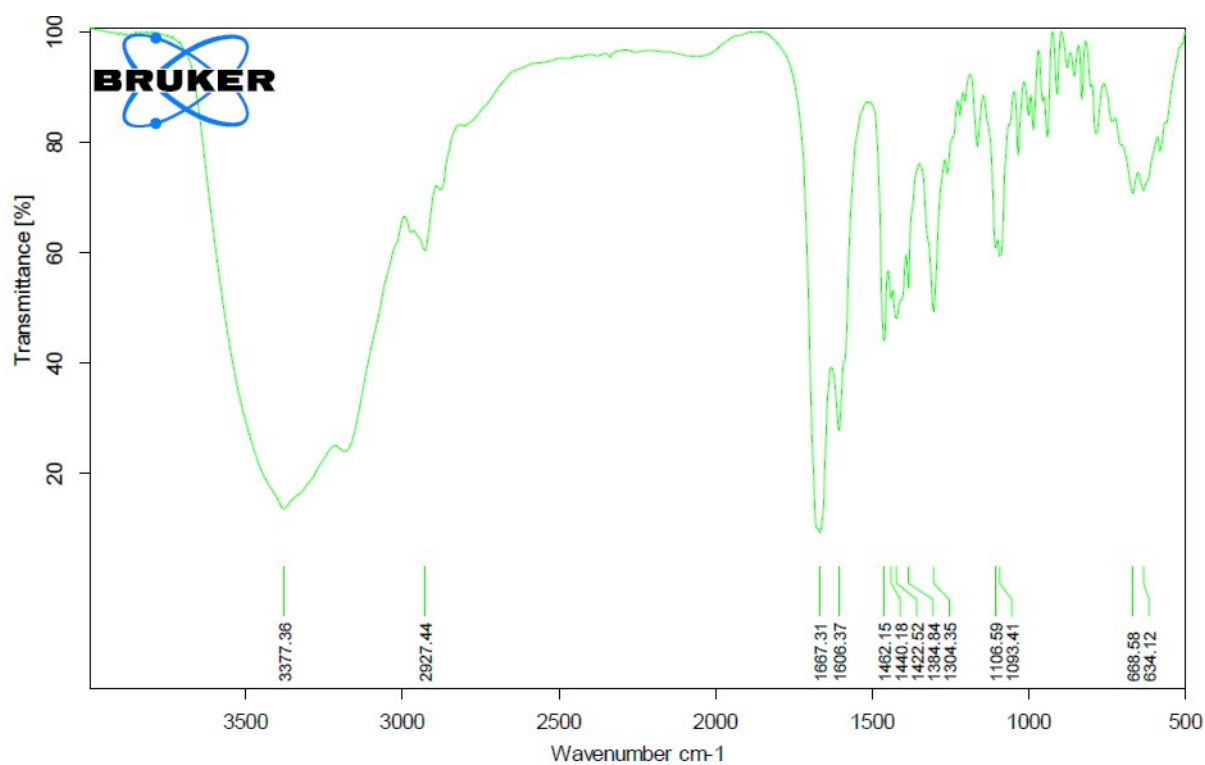

**Fig. S14** FT-IR spectra of  $[\text{Ni}(\text{TPTA})\text{Cl}]^{+1}$  at ambient temperature.

## UV-vis spectra of Complexes

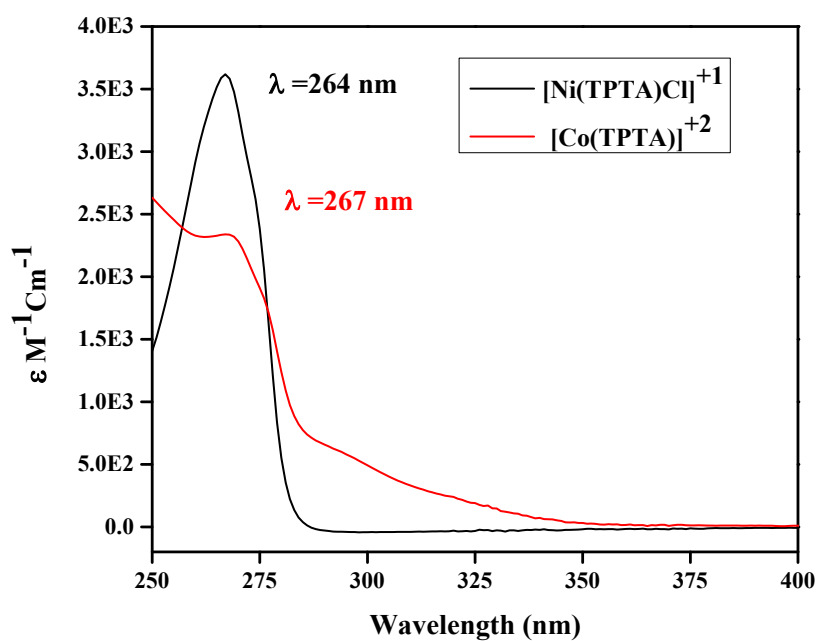

**Fig. 15** UV-visible absorption spectra of 250  $\mu\text{M}$  of  $[\text{Co}(\text{TPTA})]^{+2}$  (red) and  $[\text{Ni}(\text{TPTA})\text{Cl}]^{+1}$  in aqueous solutions containing 20 mM HEPES and 100 mM NaCl at ambient temperature.



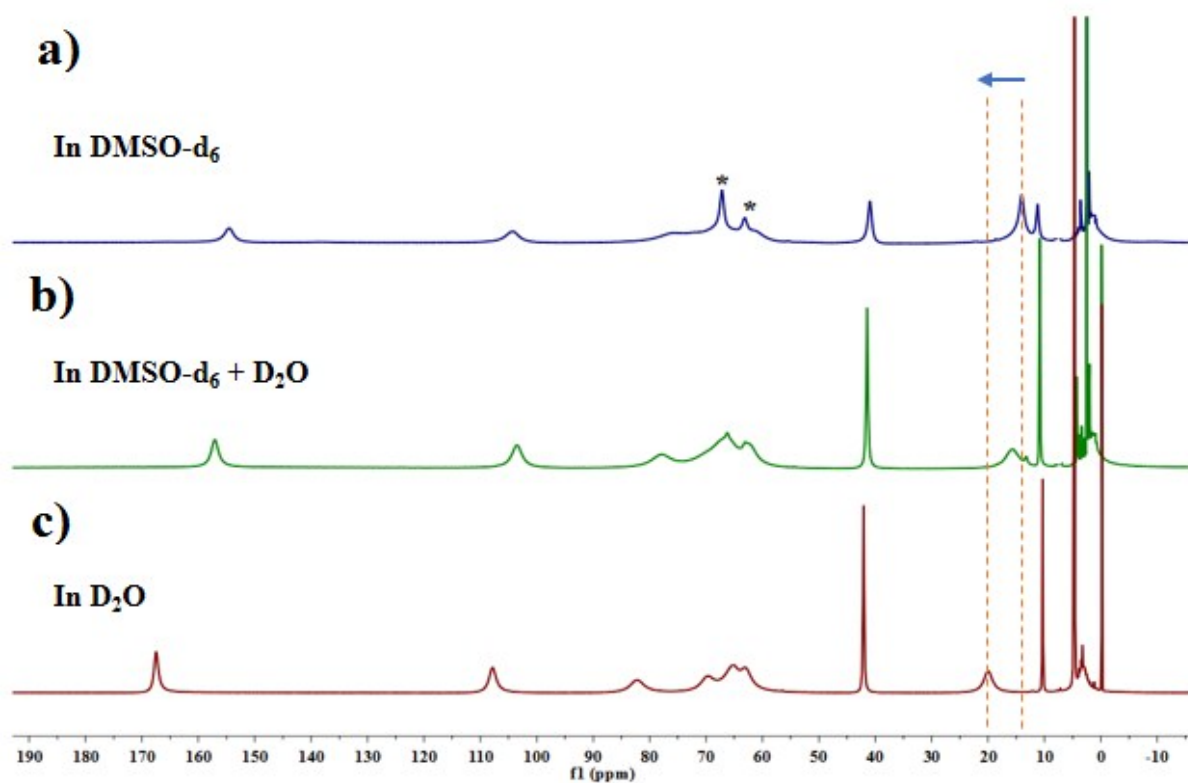

**Fig. S16**  $^1\text{H}$  NMR spectra of (a)  $[\text{Co}(\text{TPTA})]^{+2}$  in  $\text{DMSO-d}_6$  (b) upon addition of 50  $\mu\text{L}$   $\text{D}_2\text{O}$  (c)  $[\text{Co}(\text{TPTA})]^{+2}$  in  $\text{D}_2\text{O}$  at ambient temperature. The exchangeable amide (NH) protons marked an asterisk (\*).

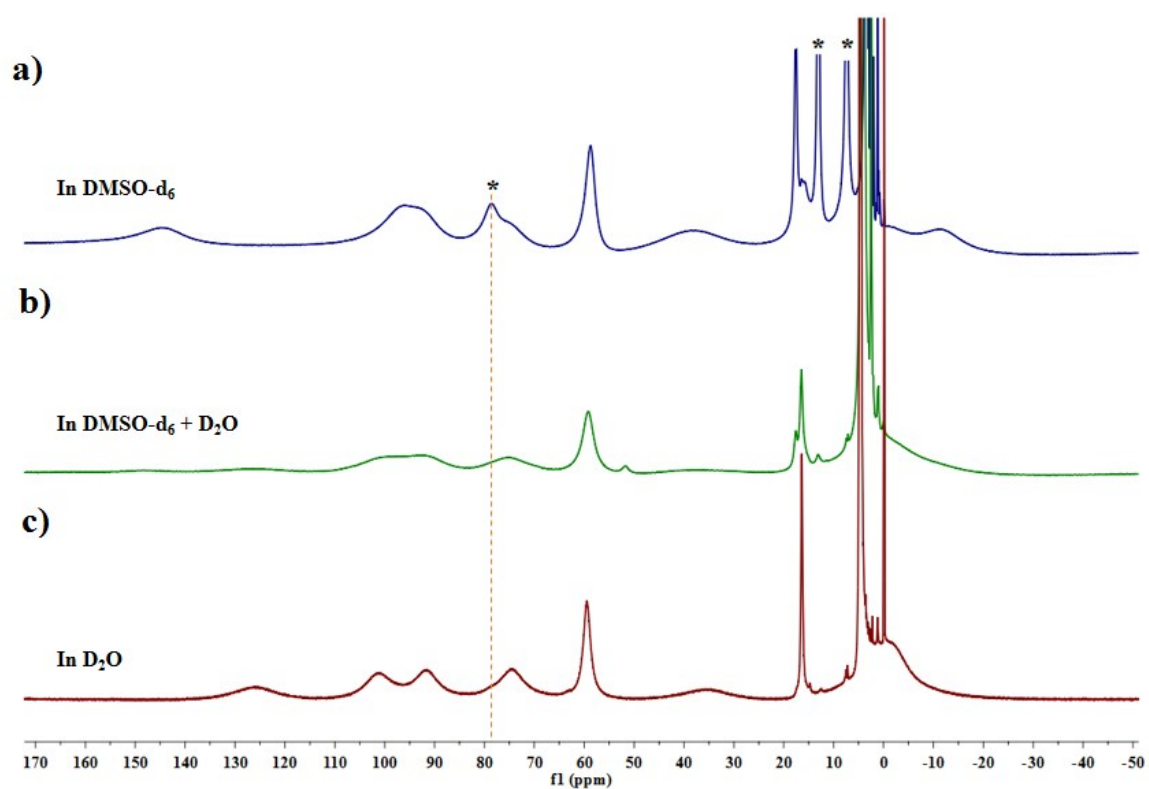

**Fig. S17**  $^1\text{H}$  NMR spectra of (a)  $[\text{Ni}(\text{TPTA})\text{Cl}]^{+1}$  in  $\text{DMSO-}\text{d}_6$  (b) upon addition of 100  $\mu\text{L}$   $\text{D}_2\text{O}$  (c)  $[\text{Ni}(\text{TPTA})\text{Cl}]^{+1}$  in  $\text{D}_2\text{O}$  at ambient temperature. The exchangeable amide (NH) protons marked an asterisk (\*).

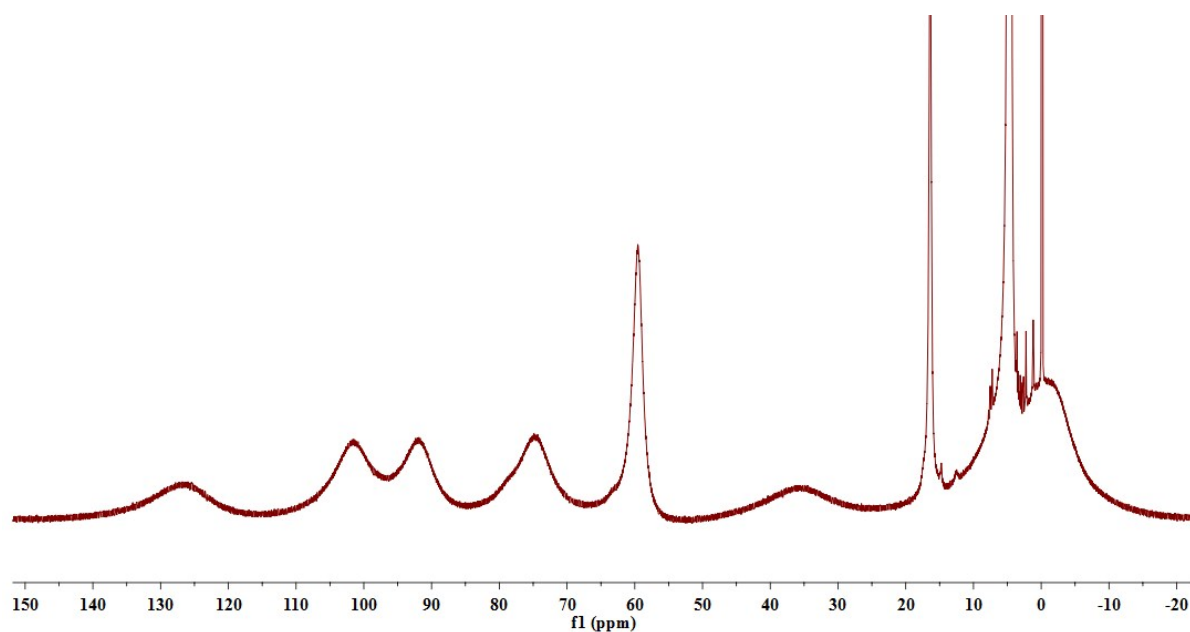

**Fig. S18**  $^1\text{H}$  NMR spectra of  $[\text{Ni}(\text{TPTA})\text{Cl}]^{+1}$  in  $\text{D}_2\text{O}$ .

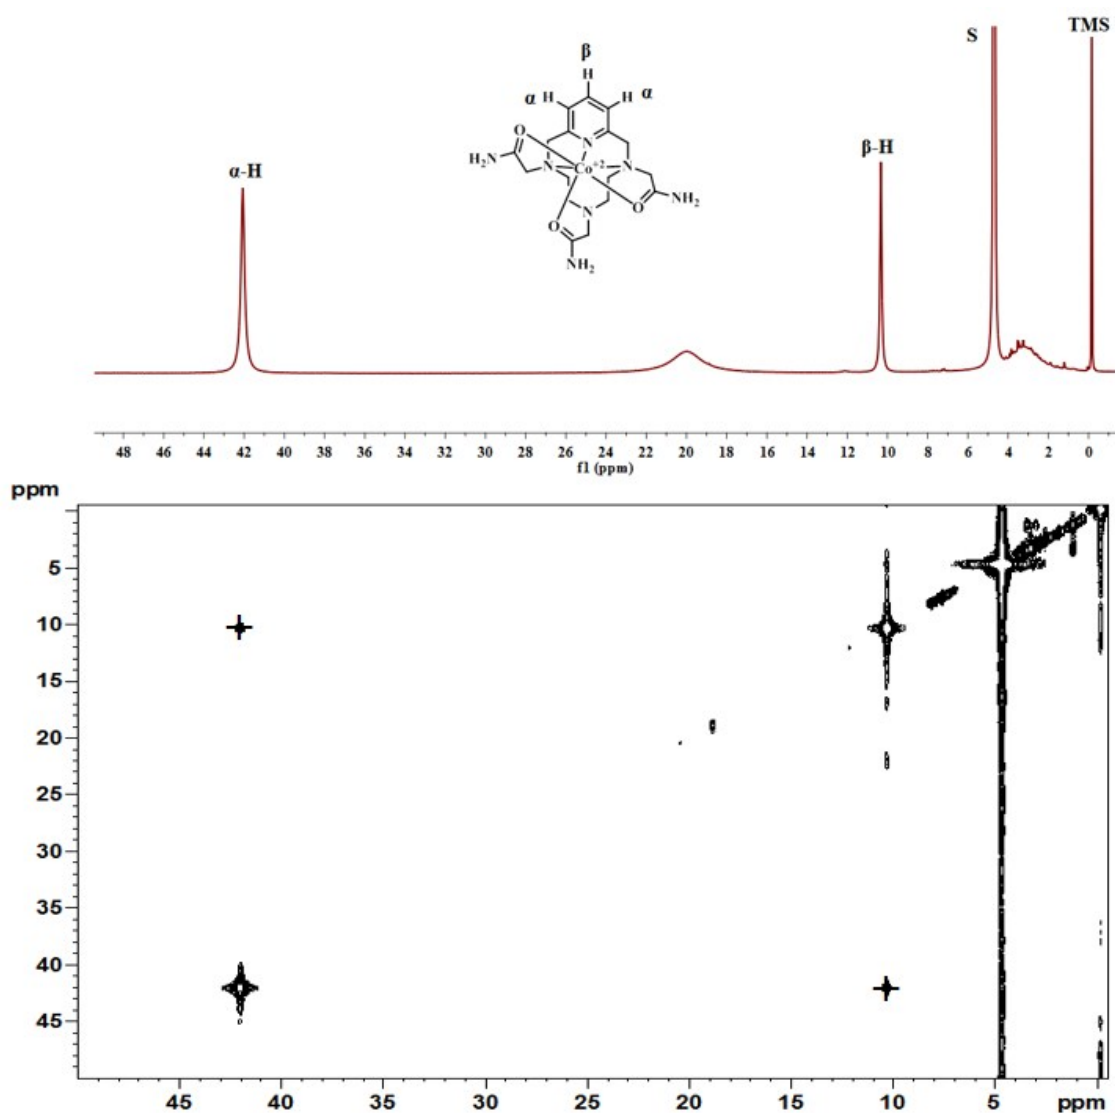

**Fig. S19** Two-dimensional  $^1\text{H}$ - $^1\text{H}$ -COSY NMR spectrum (25 °C) obtained at 128 scans of 150 mM  $[\text{Co}(\text{TPTA})]^{2+}$  in  $\text{D}_2\text{O}$  (pD 7.0) showing the cross-peaks that allowed the identification of the proton resonances produced by aromatic protons of pyridine ring of the macrocyclic backbone.

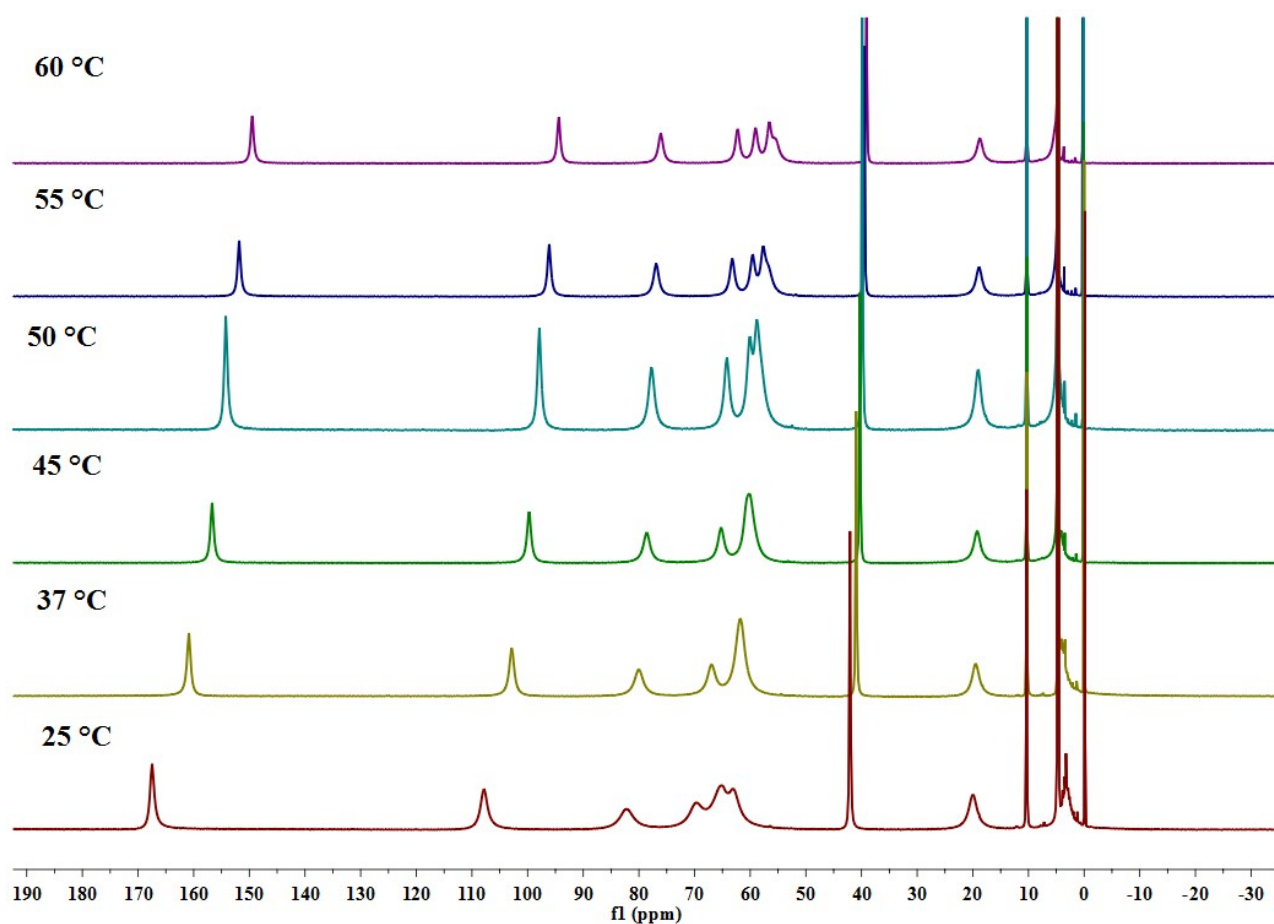

**Fig. S20**  $^1\text{H}$  NMR spectra of  $[\text{Co}(\text{TPTA})]^{+2}$  at varying temperature in  $\text{D}_2\text{O}$  from 25 °C to 60 °C.

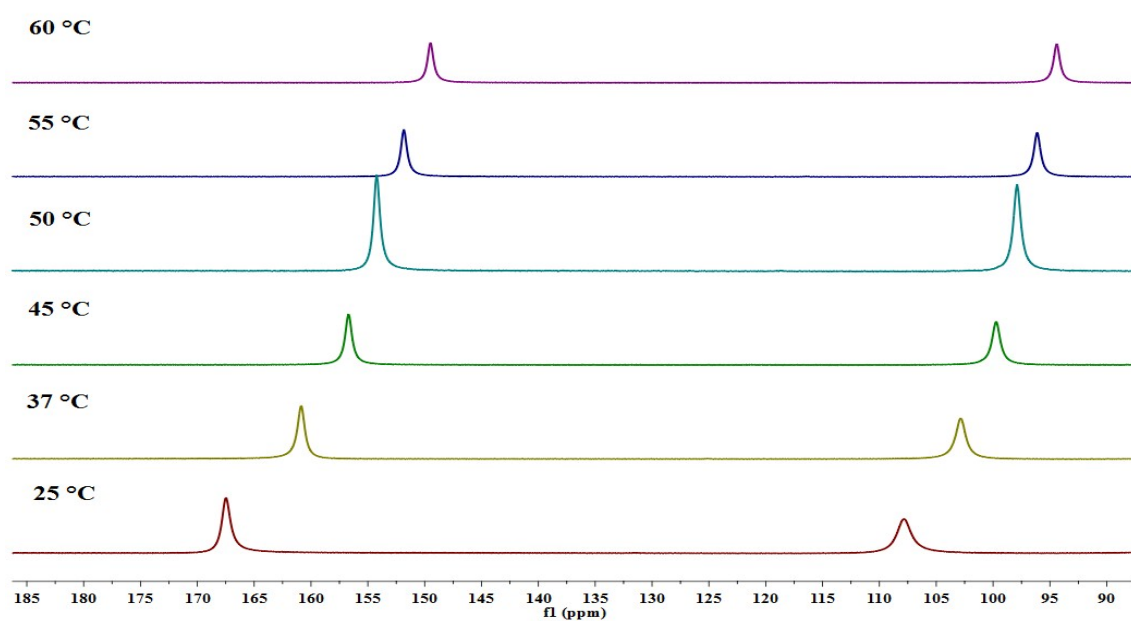

**Fig. S21** Expansion showing  $^1\text{H}$  NMR resonances of two downfield highly-shifted  $\text{CH}_2$  peaks of  $[\text{Co}(\text{TPTA})]^{+2}$  at 25 to 60 °C in  $\text{D}_2\text{O}$ .

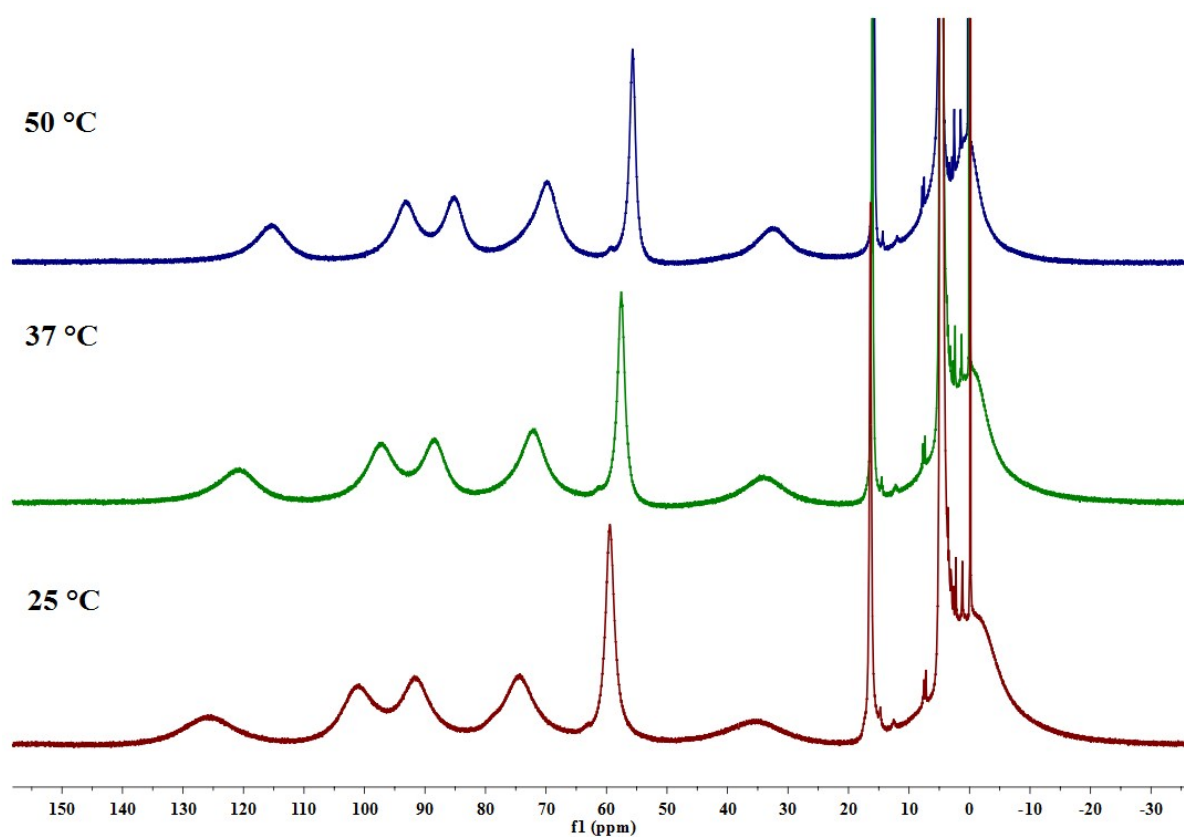

**Fig. S22**  $^1\text{H}$  NMR spectra of  $[\text{Co}(\text{TPTA})]^{+2}$  at varying temperature in  $\text{D}_2\text{O}$  from 25 °C to 50 °C.

### Magnetic susceptibility measurement

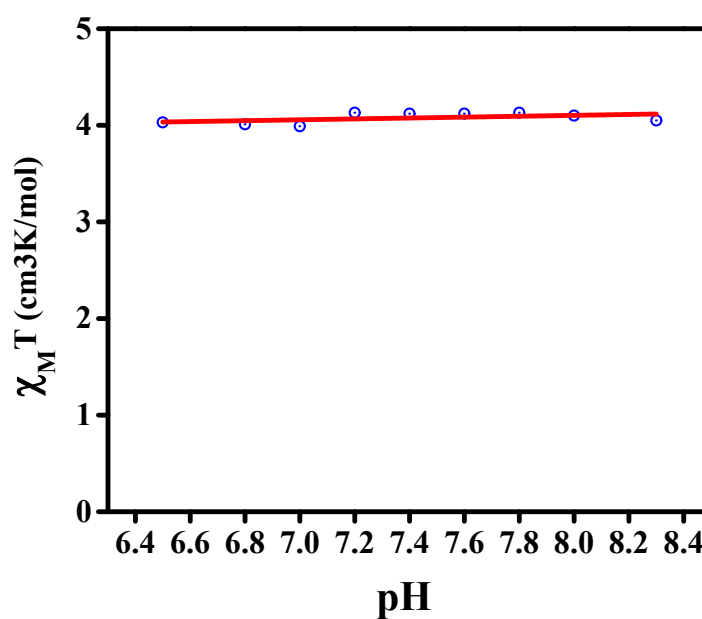

**Fig. S23** Variable-pH magnetic susceptibility data for  $[\text{Co}(\text{TPTA})]^{+2}$  in aqueous solutions containing 20 mM HEPES and 100 mM NaCl at 37 °C, obtained using the Evans .Circles

represent experimental data and the solid black line denotes the average value of  $\chi_M T = 4.07 \pm 0.1 \text{ cm}^3 \text{ K mol}^{-1}$ .

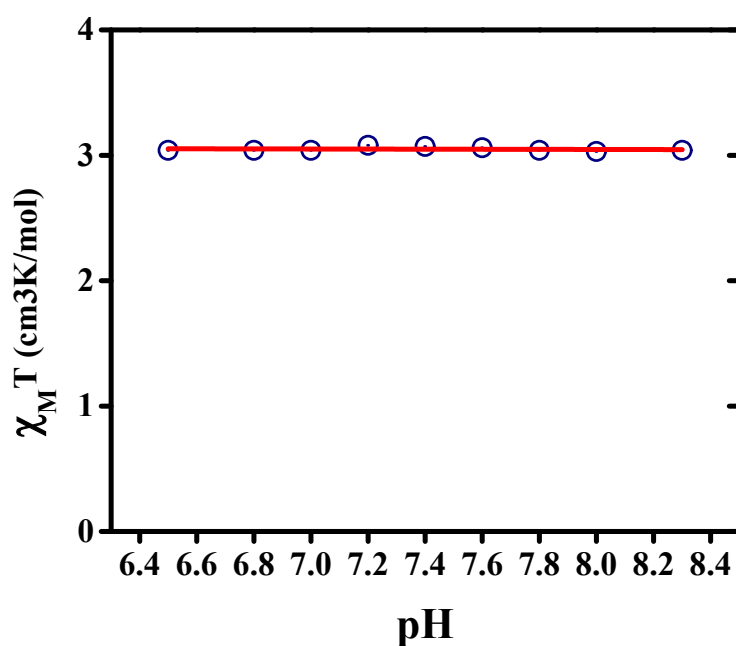

**Fig. S24** Variable-pH magnetic susceptibility data for  $[\text{Ni}(\text{TPTA})\text{Cl}]^{+1}$  in aqueous solutions containing 20 mM HEPES and 100 mM NaCl at 37 °C, obtained using the Evans .Circles represent experimental data and the solid black line denotes the average value of  $\chi_M T = 3.05 \pm 0.02 \text{ cm}^3 \text{ K mol}^{-1}$ .

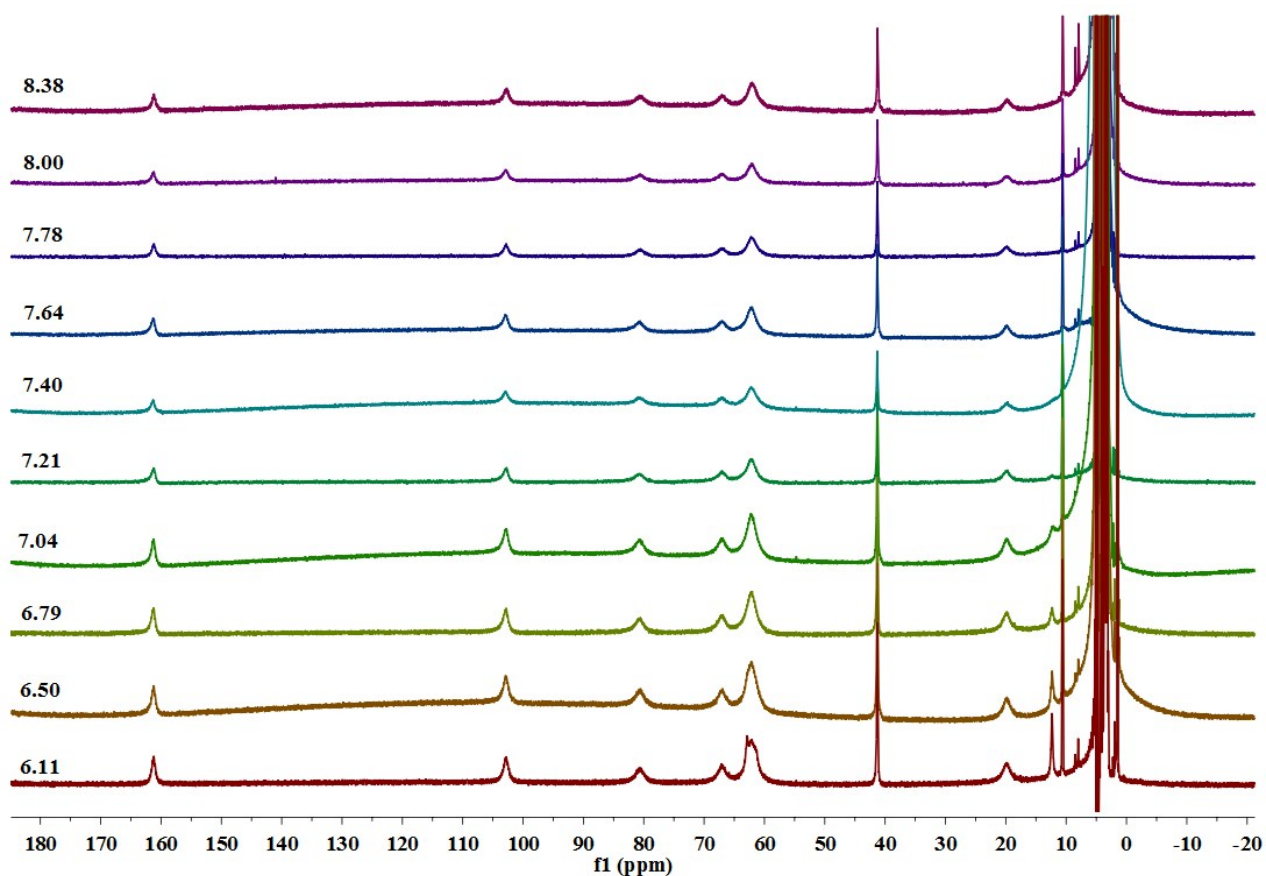

**Fig. S25** Variable-pH  $^1\text{H}$  NMR spectra of 10 mM of  $[\text{Co}(\text{TPTA})]^{+2}$  in aqueous solutions containing 20 mM HEPES and 100 mM NaCl buffered at various pH values at 37 °C.

### $^1\text{H}$ NMR of Dissociation study

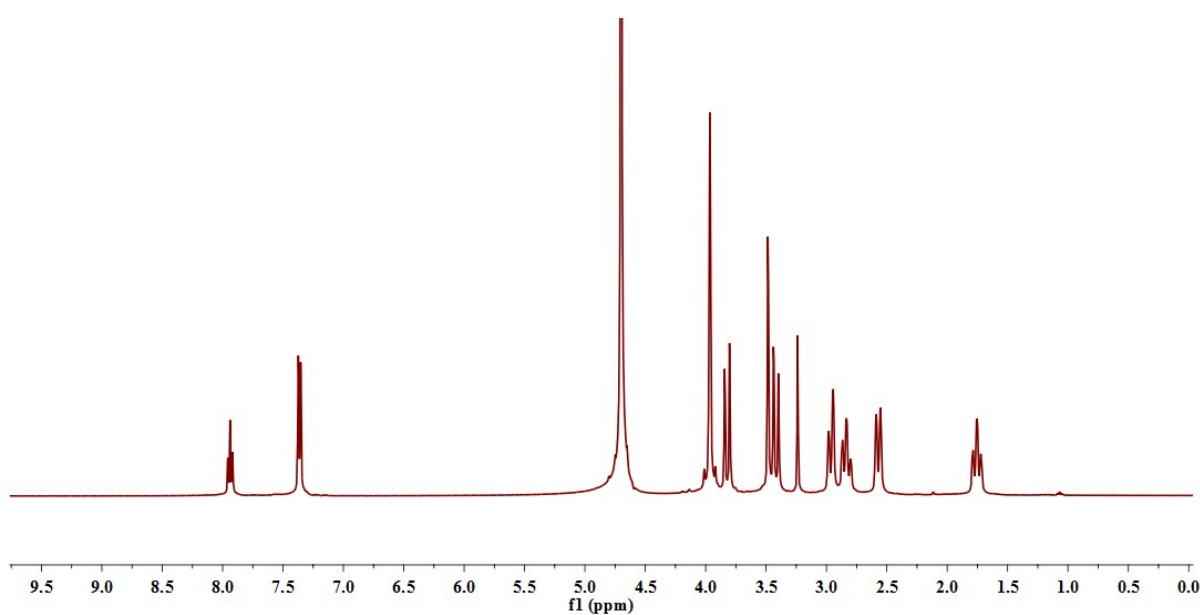

**Fig. S26**  $^1\text{H}$  NMR spectra of  $[\text{Zn}(\text{TPTA})]^{+2}$  complex in  $\text{D}_2\text{O}$ .

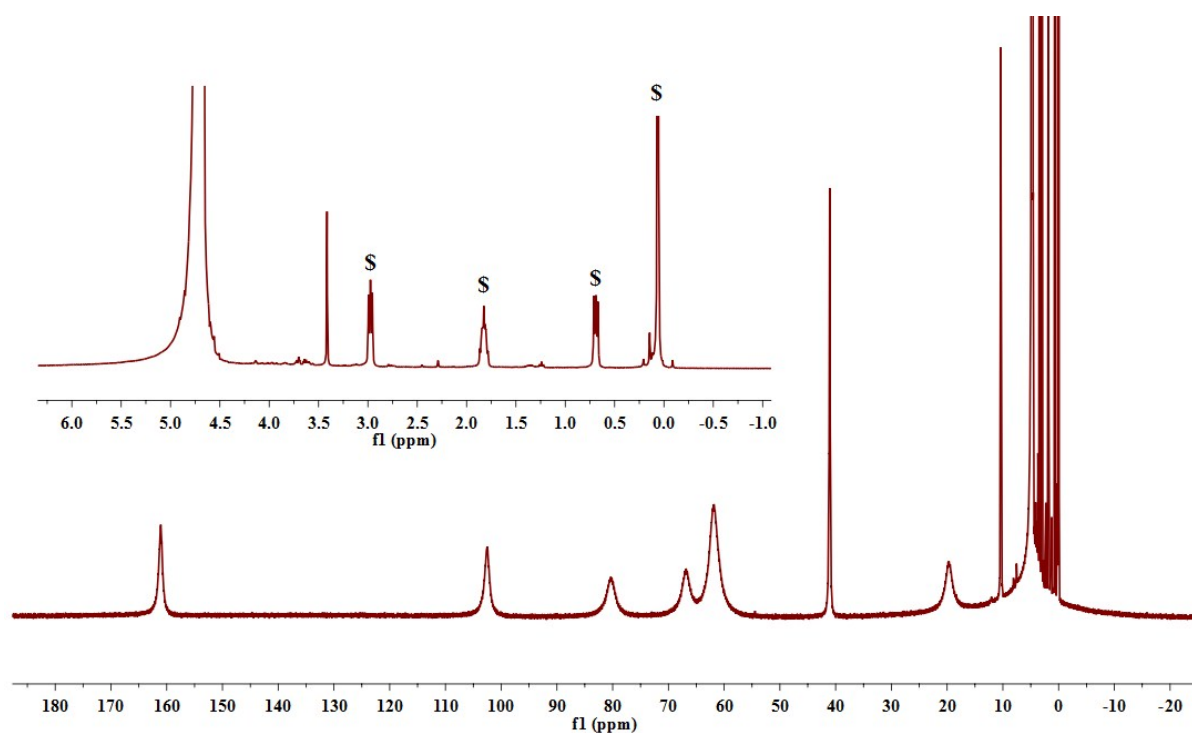

**Fig. S27**  $^1\text{H}$  NMR spectra of  $10\text{ mM } [\text{Co}(\text{TPTA})]^{+2}$ ,  $100\text{ mM NaCl}$ ,  $5\text{ mM}$  3-(trimethylsilyl)-1-propanesulfonic acid sodium salt (§) at pH 7.0 as a standard solution for dissociation at  $37^\circ\text{C}$ . Inset represents the diamagnetic region.

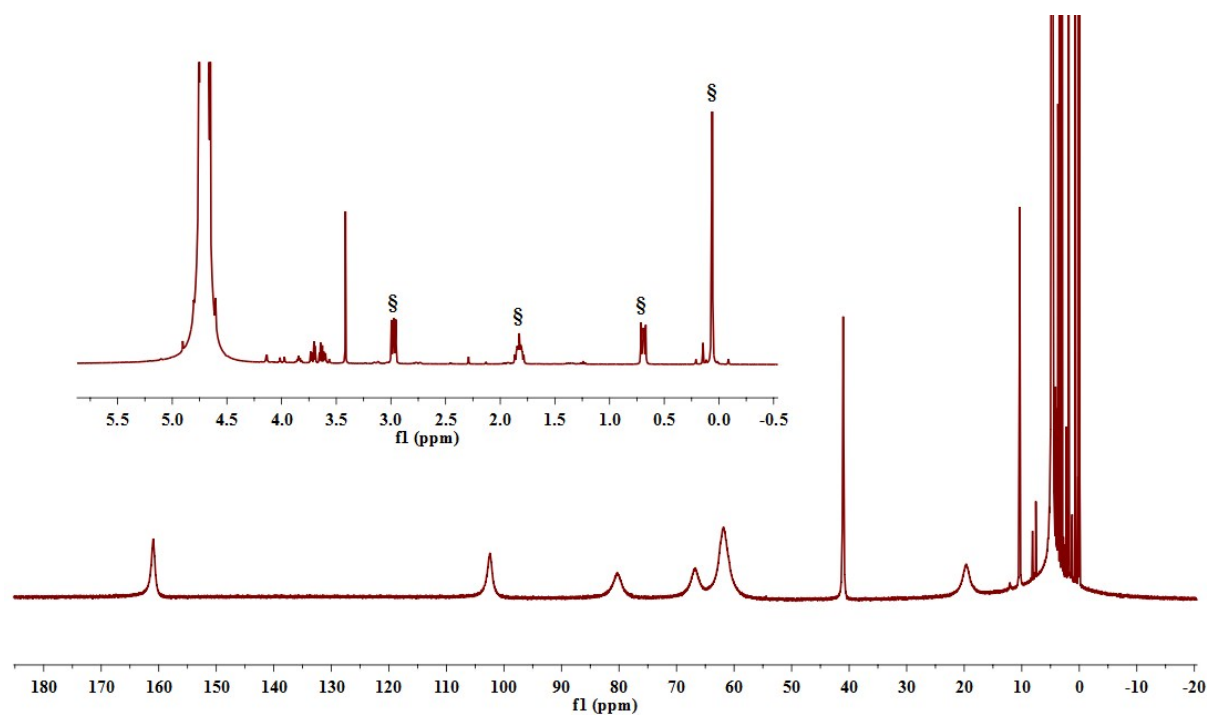

**Fig. S28**  $^1\text{H}$  NMR spectra of  $12.5\text{ mM } [\text{Co}(\text{TPTA})]^{+2}$ ,  $100\text{ mM NaCl}$ ,  $5\text{ mM}$  3-(trimethylsilyl)-1-propanesulfonic acid sodium salt (§) at pH 3.96 after 72 hour of incubation at  $37^\circ\text{C}$ . The



percentage of dissociation of  $[\text{Co}(\text{TPTA})]^{+2}$  was calculated by integrating paramagnetic peaks at 102 and 161 ppm verses standard. Inset represents the diamagnetic region. Peaks at 3.5 -4.0 ppm represent the newly formed free ligand in acidic solution.

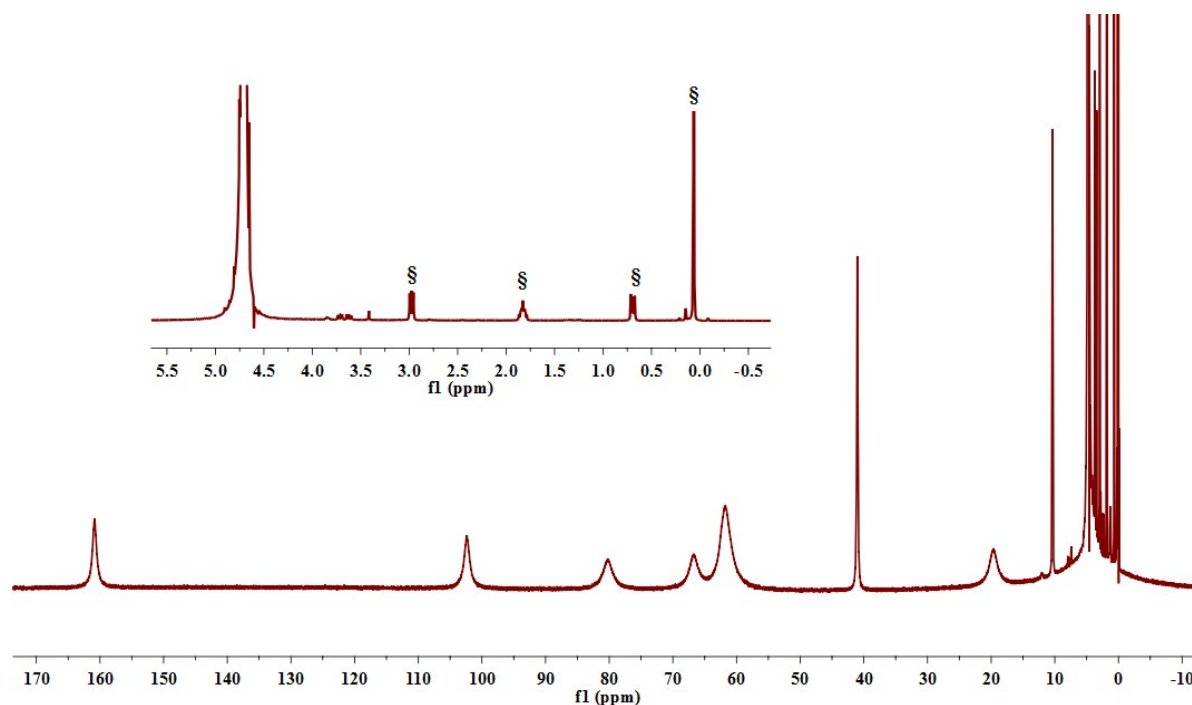

**Fig. S29**  $^1\text{H}$  NMR spectra of 10.5 mM  $[\text{Co}(\text{TPTA})]^{+2}$ , 100 mM NaCl, 0.4 mM  $\text{Na}_2\text{HPO}_4$ , 25mM  $\text{K}_2\text{CO}_3$  at pD 7.34 after 72 hour of incubation at 37 °C. The 3 mM 3-(trimethylsilyl)-1-propanesulfonic acid sodium salt (\$) was added as a reference. The percentage of dissociation of  $[\text{Co}(\text{TPTA})]^{+2}$  was calculated by integrating paramagnetic peaks at 102 and 161 ppm verses standard. Inset represents the diamagnetic region.

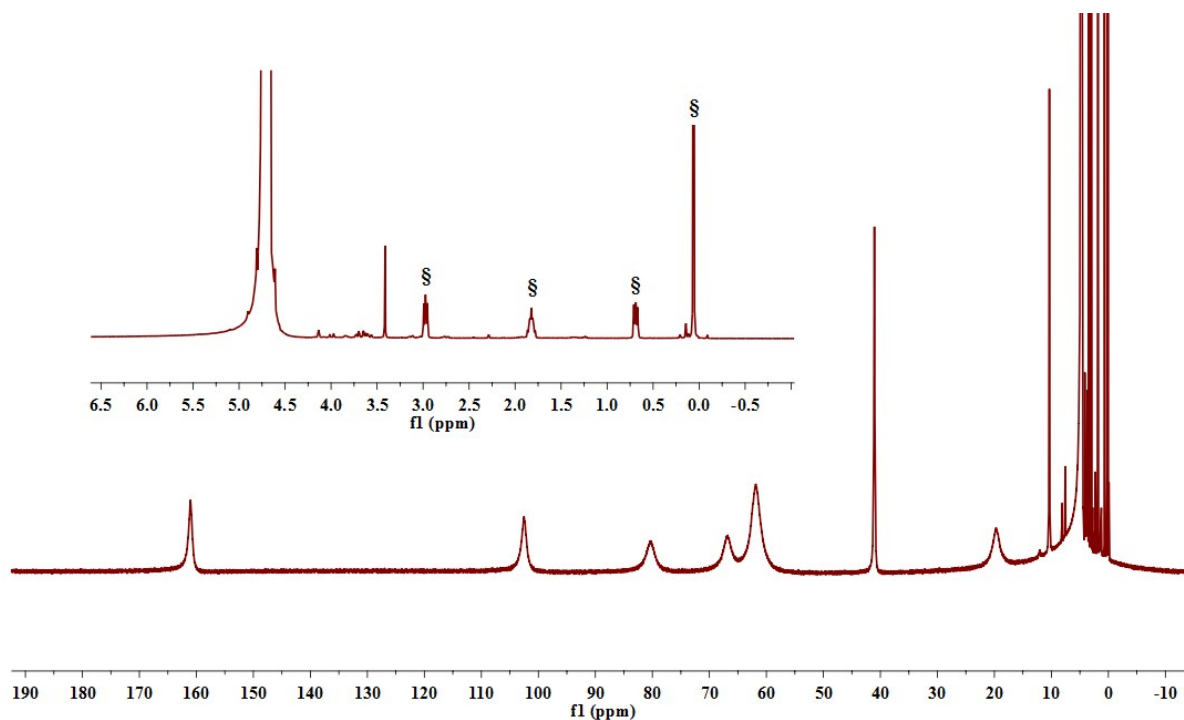

**Fig. S30** <sup>1</sup>H NMR spectra of 10 mM [Co(TPTA)]<sup>2+</sup>, 100 mM NaCl, 5 mM 3-(trimethylsilyl)-1-propanesulfonic acid sodium salt (§), incubated with 10 mM ZnCl<sub>2</sub> at pD 7.01 after 72 hours of incubation at 37 °C. Spectrum showed no evidence of free ligands in the solution. Inset represents the diamagnetic region.

### Determination of Exchange rate constant in buffered medium

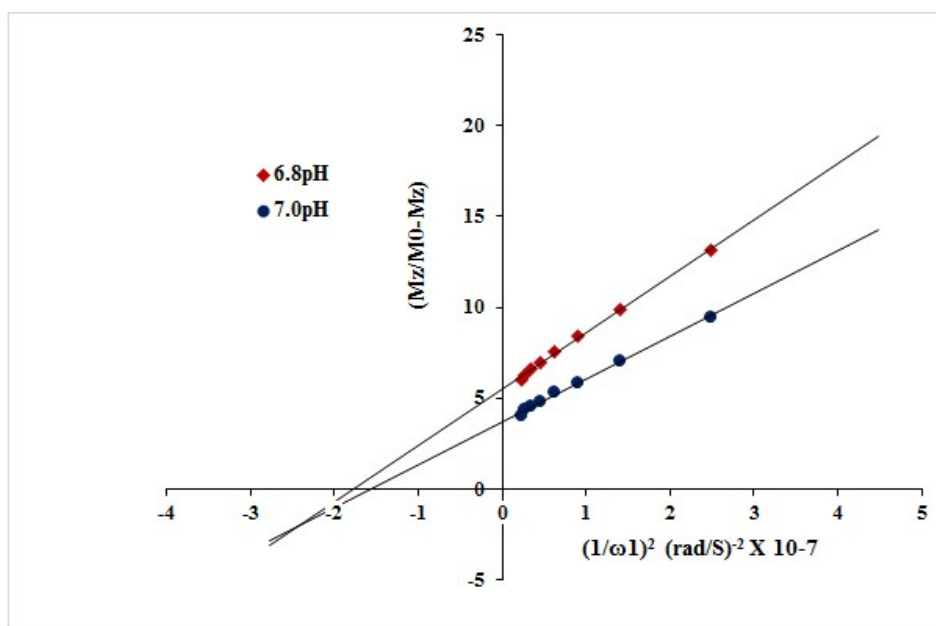

**Fig. S31** Experimental data for exchange rate measurement of [Co(TPTA)]<sup>2+</sup> in buffered medium at pH 6.8 and 7.0. The desired linear relationship of  $M_z/(M_0 - M_z)$  as a function of  $1/\omega_1^2 \text{ (rad/sec)}^{-2} \times 10^{-7}$  recorded at 9.4 T of 10 mM complex in 100 mM NaCl and 20 mM HEPES buffer. RF presaturation pulse was applied for 4 s with varying saturation power of 7.5  $\mu$ T to 25  $\mu$ T.

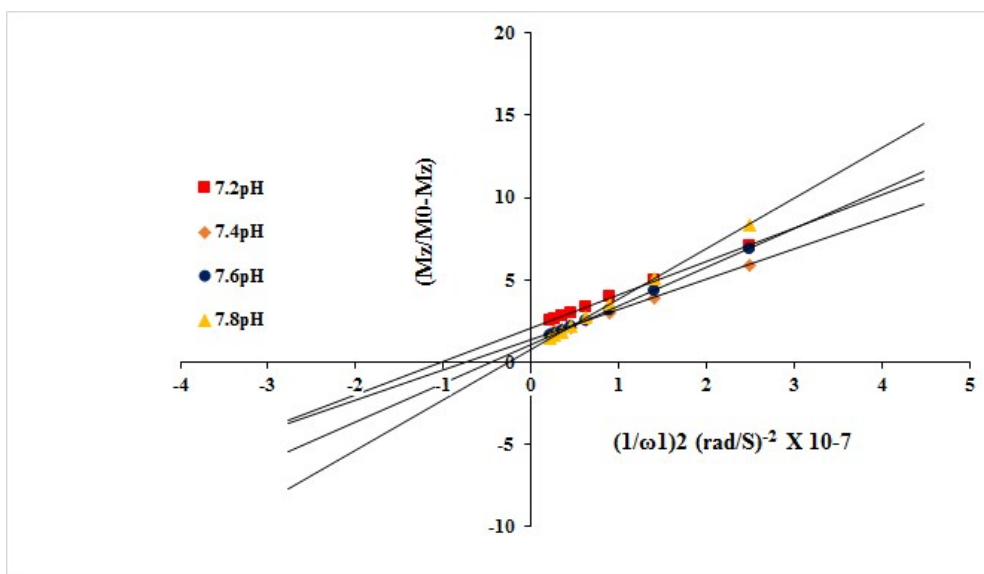

**Fig. S32** Experimental data for exchange rate measurement of  $[\text{Co}(\text{TPTA})]^{+2}$  in buffered medium from pH 7.2-7.8. The desired linear relationship of  $M_z/(M_0 - M_z)$  as a function of  $1/\omega_1^2$  ( $\text{rad/sec})^{-2} \times 10^{-7}$  recorded at 9.4 T of 10 mM complex in 100 mM NaCl and 20 mM HEPES buffer. RF presaturation pulse was applied for 4 s with varying saturation power of 7.5  $\mu\text{T}$  to 25  $\mu\text{T}$ .

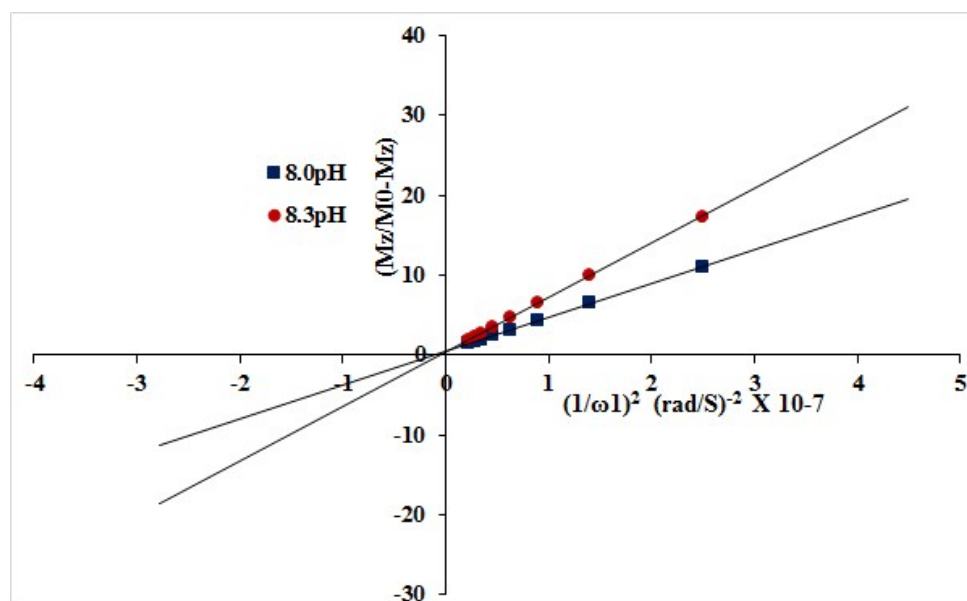

**Fig. S33** Experimental data for exchange rate measurement of  $[\text{Co}(\text{TPTA})]^{+2}$  in buffered medium at pH 8 and 8.3. The desired linear relationship of  $M_z/(M_0 - M_z)$  as a function of  $1/\omega_1^2$  ( $\text{rad/sec})^{-2} \times 10^{-7}$  recorded at 9.4 T of 10 mM complex in 100 mM NaCl and 20 mM HEPES buffer. RF presaturation pulse was applied for 4 s with varying saturation power of 7.5  $\mu\text{T}$  to 25  $\mu\text{T}$ .

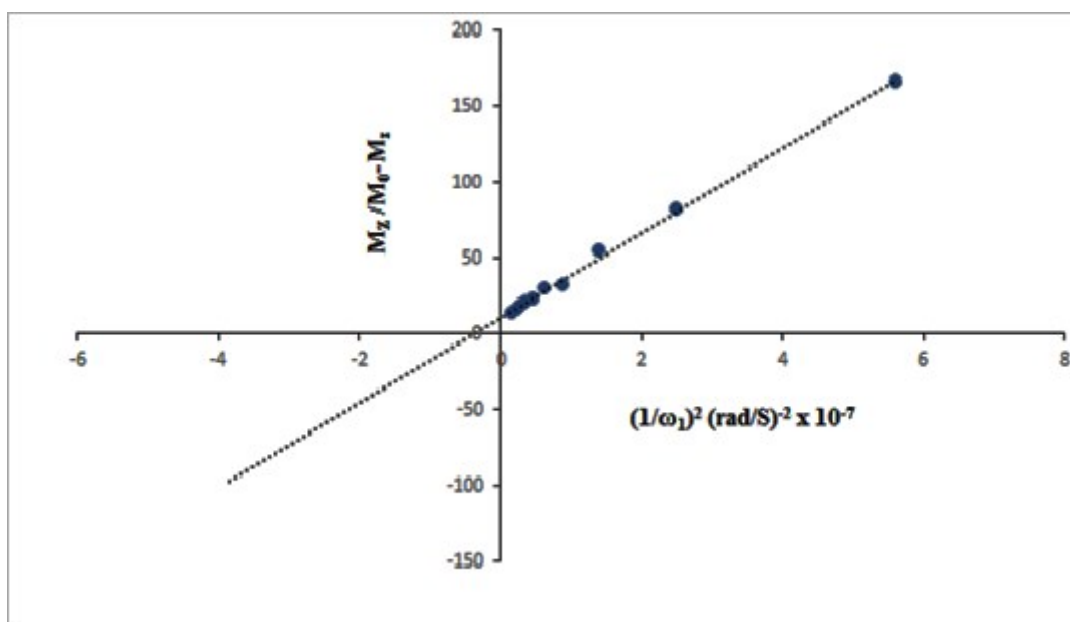

**Fig. S34** Experimental data for exchange rate measurement of  $[\text{Ni}(\text{TPTA})\text{Cl}]^{+1}$  in buffered medium at 7.4.  $M_z/(M_0-M_z)$  is plotted as a function of  $1/\omega_1^2$  (rad/sec) $^{-2} \times 10^{-7}$ . The exchange constant measurement experiments were recorded at 9.4 T for 40 mM complex in 100 mM NaCl and 20 mM HEPES buffer. RF presaturation pulse was applied for 4 s with varying saturation power from 5  $\mu\text{T}$  to 30  $\mu\text{T}$ .

### Determination of Exchange rate constant in different media

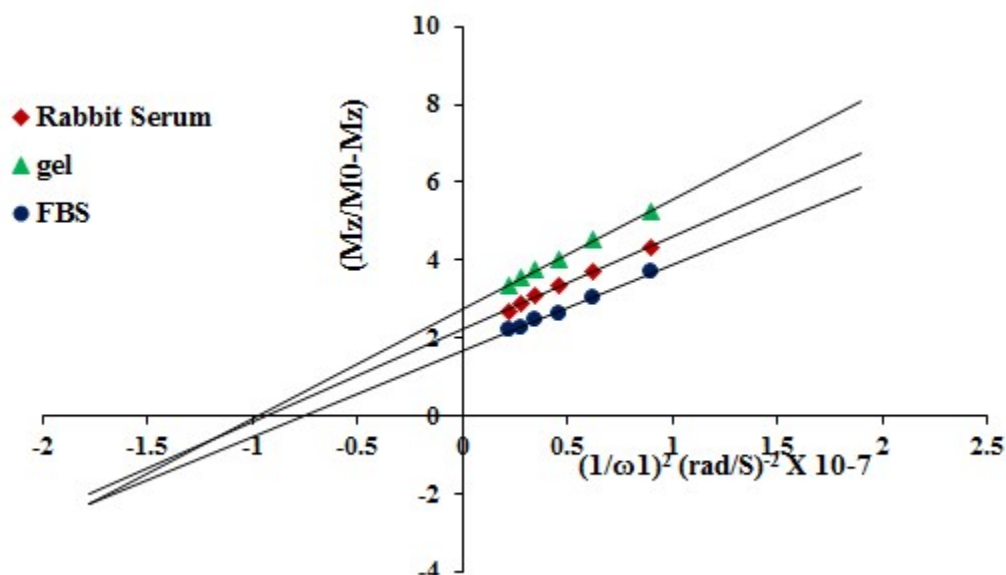

**Fig. S35** Experimental data for exchange rate measurement of  $[\text{Co}(\text{TPTA})]^{+2}$  in biological media. The desired linear relationship of  $M_z/(M_0-M_z)$  as a function of  $1/\omega_1^2$  (rad/sec) $^{-2} \times 10^{-7}$  recorded at 9.4 T of 10 mM complex in 100 mM NaCl, 20 mM HEPES and 4% Agarose gel

(red squares), in rabbit serum (brown circle) and in FBS (blue diamond) at pH 7.4. RF presaturation pulse was applied for 2 s with varying saturation power of 12  $\mu$ T to 25  $\mu$ T.

**Table S1** Proton exchange rate constants for  $[\text{Co}(\text{TPTA})]^{+2}$  at different pH of 10 mM complex in 100 mM NaCl and 20 mM HEPES.

| pH of the $[\text{Co}(\text{TPTA})]^{+2}$ complex in buffer | 6.8  | 7.0  | 7.2  | 7.4  | 7.6  | 7.8  | 8.0  | 8.3   |
|-------------------------------------------------------------|------|------|------|------|------|------|------|-------|
| Exchange rate constant ( $\text{s}^{-1}$ )                  | 2379 | 2519 | 3047 | 3691 | 4626 | 6280 | 9134 | 13380 |

## Concentration dependence of CEST effect

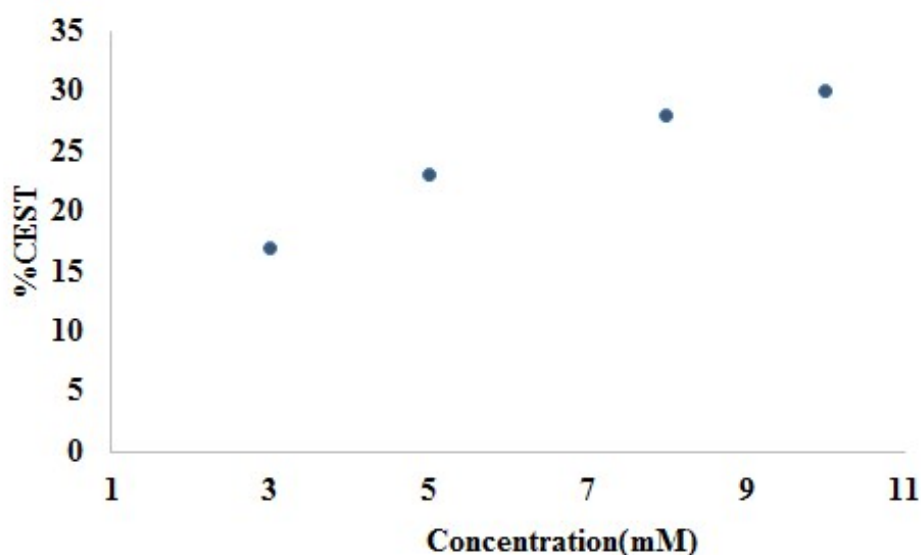

**Fig. S36** Concentration dependent study of CEST effect at physiological condition (pH 7.4, 37 °C). CEST effects measured for 3 mM, 5 mM, 8 mM and 10 mM  $[\text{Co}(\text{TPTA})]^{+2}$  complex in 100 mM NaCl and 20 mM HEPES buffer. RF presaturation pulse was applied for 2 s with  $B_1=25\mu\text{T}$ .

## Dissociation study

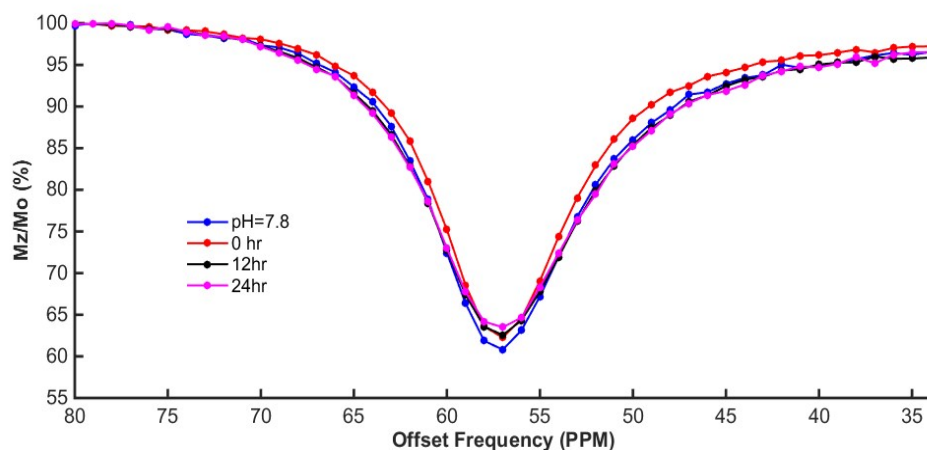

**Fig. S37** Time lapsed CEST effect study at physiological condition (pH 7.8, 37 °C). CEST effect was measured for 10 mM  $[\text{Co}(\text{TPTA})]^{+2}$  complex in 100 mM NaCl and 20mM HEPES buffer without 25 mM  $\text{K}_2\text{CO}_3$ , 0.40 mM  $\text{Na}_2\text{HPO}_4$  and with the addition of 25 mM  $\text{K}_2\text{CO}_3$ , 0.40 mM  $\text{Na}_2\text{HPO}_4$  immediately after preparing the solution (0 hour), after half a day (12 h) and after a complete day (24 h). No significant dissociation was observed in one day.

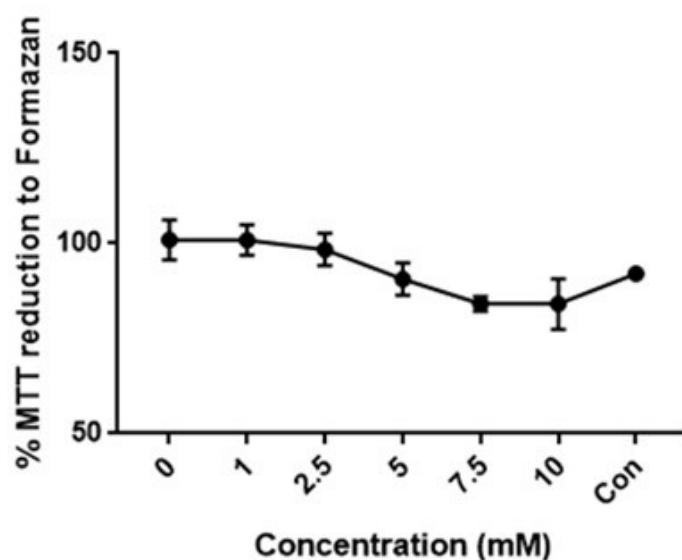

**Fig. S38** Cell-viability studies using the MTT assay of different concentration of  $[\text{Co}(\text{TPTA})]^{+2}$  complex  $[\text{Co}(\text{TPTA})]^{+2}$  on HEK cell after incubation for 24 h at 37 °C.

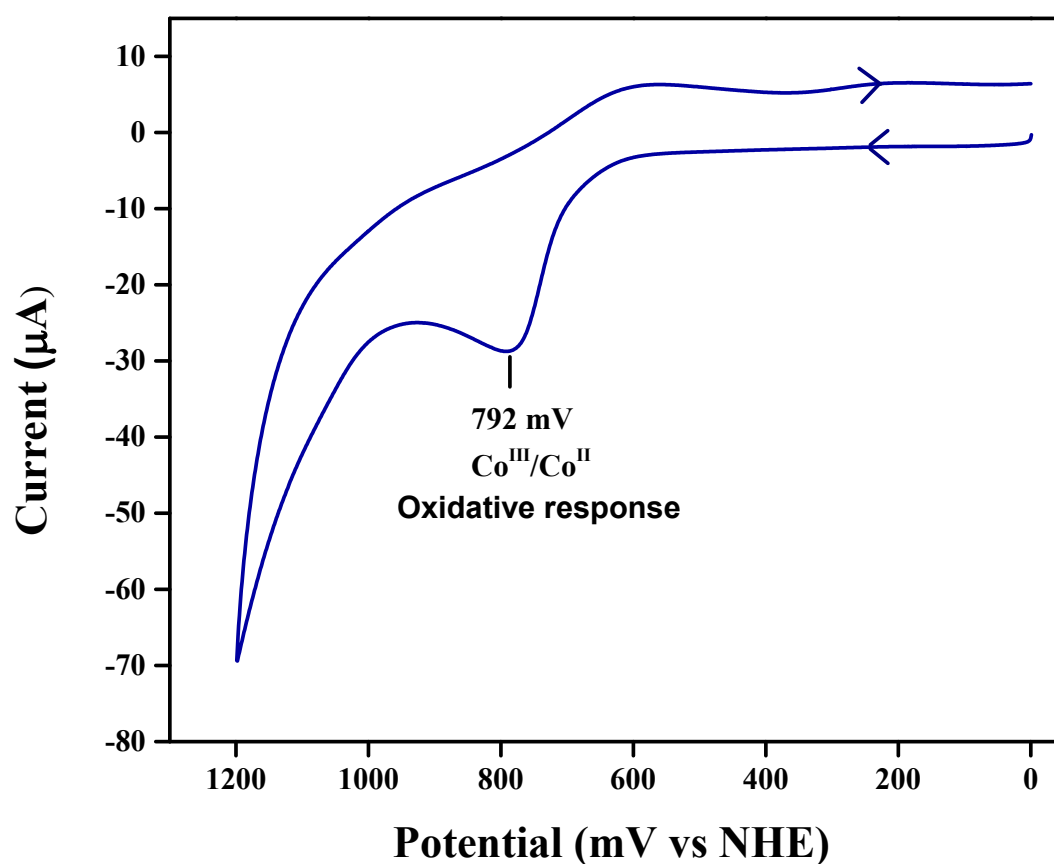

**Fig. S39** Cyclic voltammogram for 1 mM of  $[\text{Co}(\text{TPTA})]^{+2}$  in an aqueous solution containing 20 mM HEPES and 100 mM NaCl buffered at pH 7.4. Measurements was carried out at ambient temperature using a glassy carbon electrode as a working electrode with a 100 mV/s scan rate. The potential given were converted to the normal hydrogen electrode (NHE).

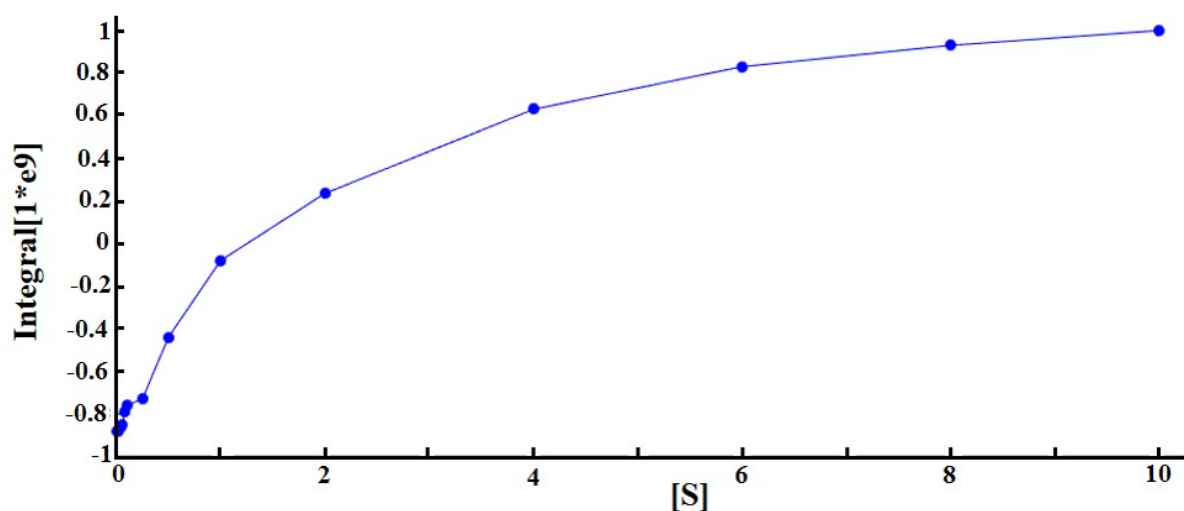

**Fig. S40**  $T_1$  relaxation plot of water in 20 mM HEPES and 100 mM NaCl buffered at pH 7.4 in absence of  $(\text{Co}[\text{TPTA}])^{2+}$ . Fitting was done using topspin 2.1. The longitudinal relaxation time constants for water proton is found to be 1.83 s

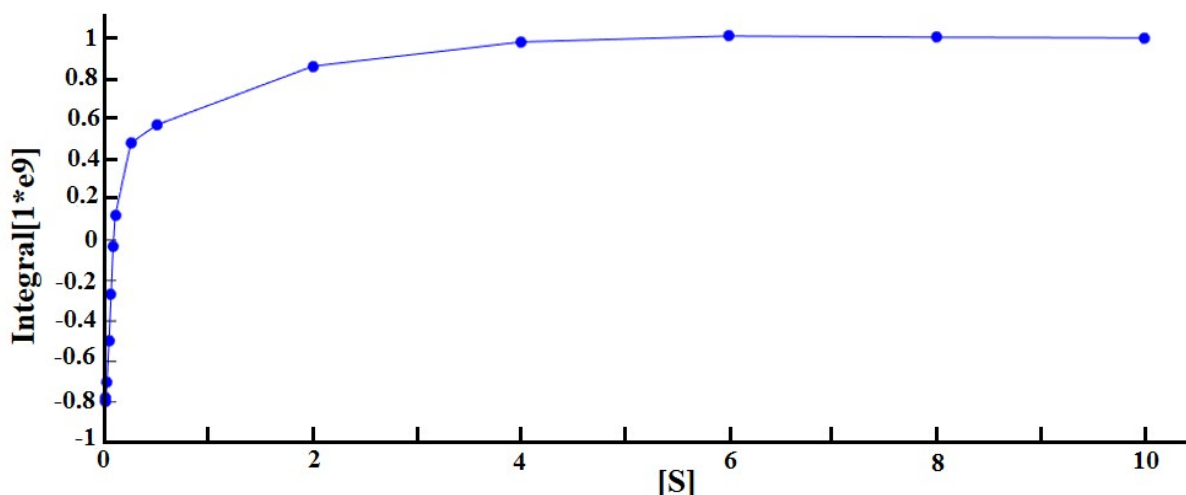

**Fig. S41**  $T_1$  relaxation plot of water in 20 mM HEPES and 100 mM NaCl buffered in the presence of  $(\text{Co}[\text{TPTA}])^{2+}$  at pH 7.4. Fitting was done using topspin 2.1. The longitudinal relaxation time constants for water proton is found to be 0.14 s

Relaxivity calculation:

Relaxivity ( $R$ ) =  $\frac{1}{c} \left( \frac{1}{T_1'} - \frac{1}{T_1} \right)$  where  $T_1'$  and  $T_1$  are the longitudinal relaxation time constants of water protons in the presence and in absence of  $(\text{Co}[\text{TPTA}])^{2+}$  respectively.

$$R = \frac{1}{10} (7.14 - 0.55) = 0.66 \text{ (mM)}^{-1}\text{s}^{-1}$$

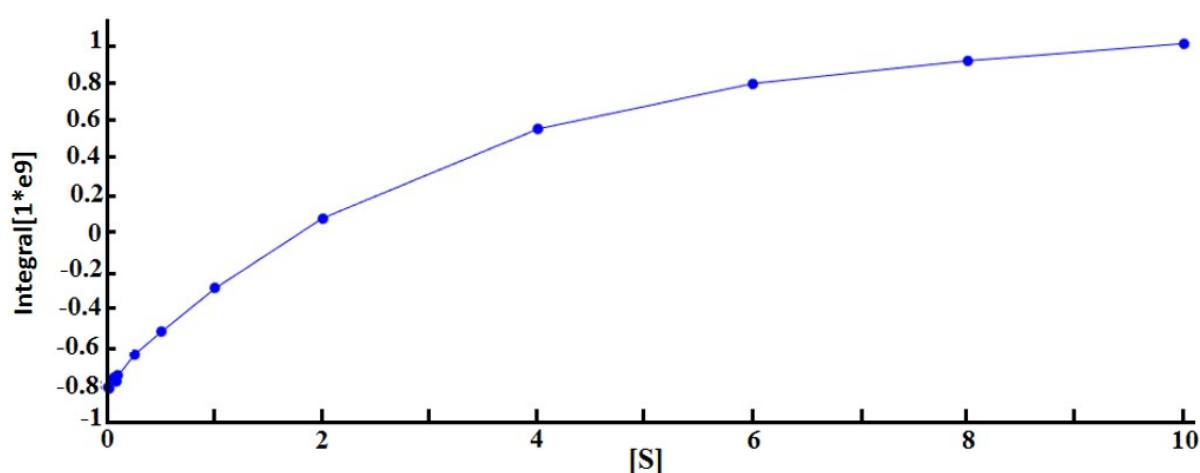

**Fig. S42**  $T_1$  relaxation plot of water in 4% Agarose gel at pH 7.4 in absence of  $(\text{Co}[\text{TPTA}])^{2+}$ . Fitting was done using topspin 2.1. The longitudinal relaxation time constants for water proton is found to be 3.039s.



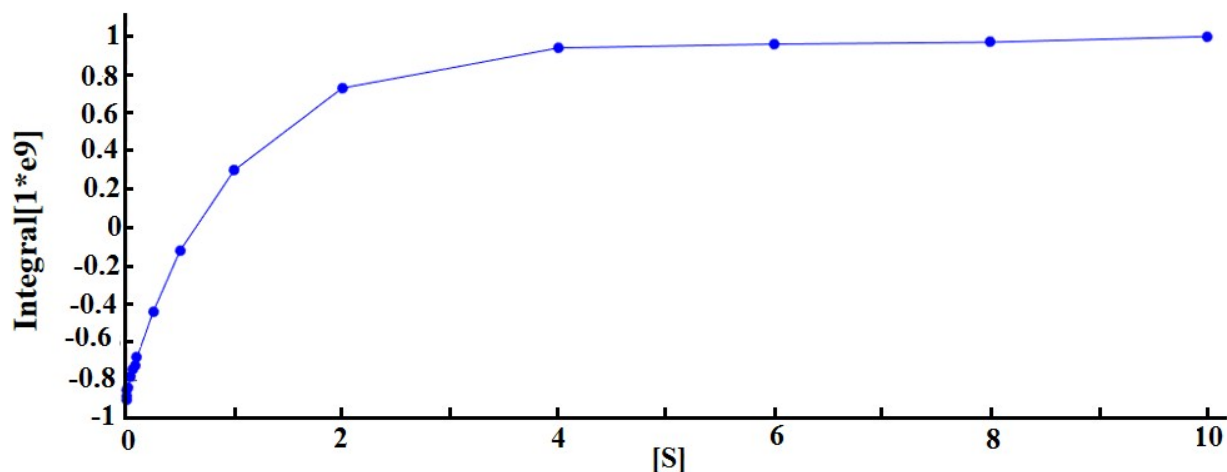

**Fig. S43**  $T_1$  relaxation plot of water in 4% Agarose gel in presence of  $(\text{Co}[\text{TPTA}])^{2+}$  at pH 7.4. The fitting was done using topspin 2.1. The longitudinal relaxation time constants of water proton is found to be 1.06s.

Relativity calculation:

Relativity (R) =  $\frac{1}{c} \left( \frac{1}{T_1'} - \frac{1}{T_1} \right)$  where  $T_1'$  and  $T_1$  are the longitudinal relaxation time constants of water protons in the presence and in absence of  $(\text{Co}[\text{TPTA}])^{2+}$  respectively.

$$R = \frac{1}{10} (0.94 - 0.33) = 0.06 \text{ (mM)}^{-1} \text{s}^{-1}$$

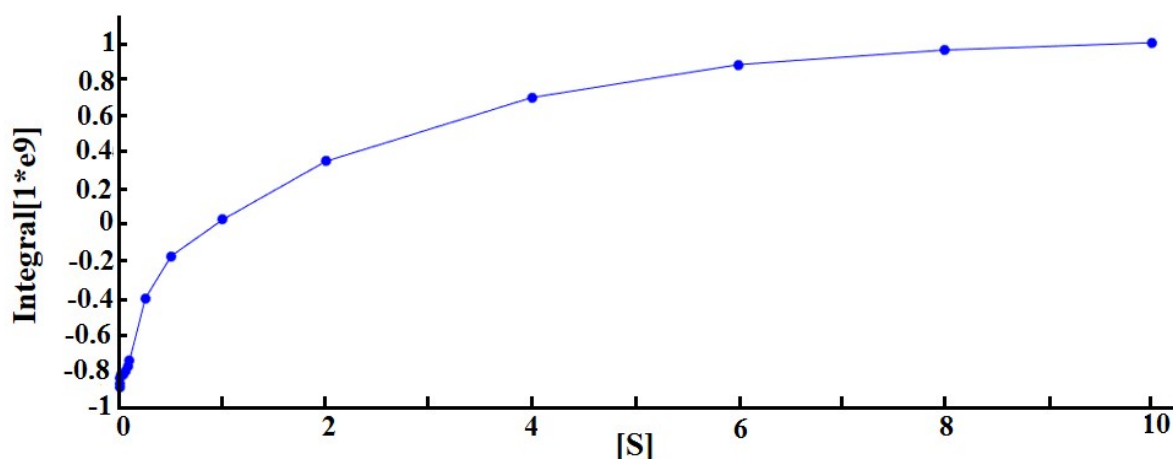

**Fig. S44**  $T_1$  relaxation plot of water Rabbit Serum at pH 7.4 in the absence of  $(\text{Co}[\text{TPTA}])^{2+}$ . Fitting was done using topspin 2.1. The longitudinal relaxation time constants for water proton is found to be 1.469s.

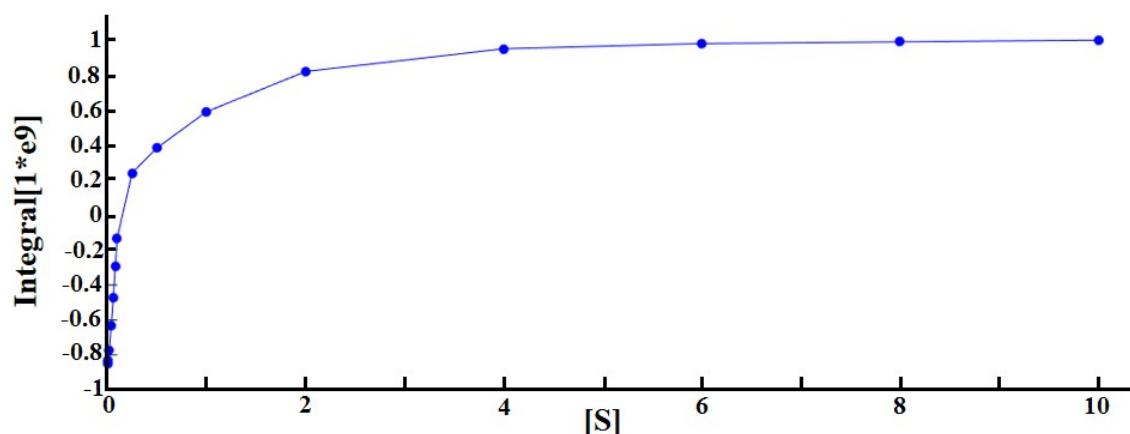

**Fig. S45** T1 relaxation plot of water Rabbit serum in the presence of  $(\text{Co}[\text{TPTA}])^{2+}$  at pH 7.4. The fitting was done using topspin 2.1. The longitudinal relaxation time constants for water proton is found to be 0.289s.

Relaxivity calculation:

Relaxivity (R) =  $\frac{1}{c} \left( \frac{1}{T_1'} - \frac{1}{T_1} \right)$  where  $T_1'$  and  $T_1$  are the longitudinal relaxation time constants of water protons in the presence and in absence of  $(\text{Co}[\text{TPTA}])^{2+}$  respectively.

$$R = \frac{1}{10} (3.46 - 0.68) = 0.28 \text{ (mM)}^{-1}\text{s}^{-1}$$

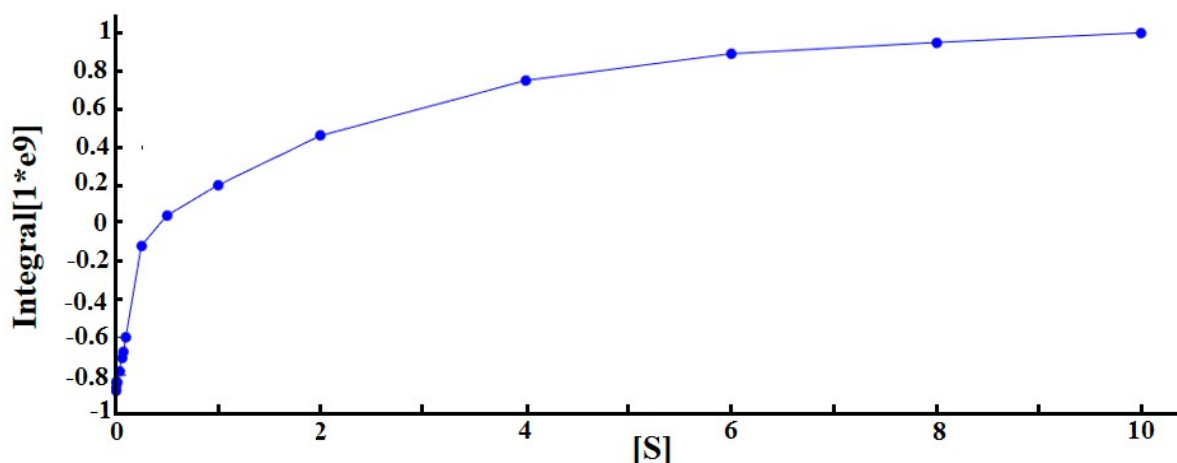

**Fig. S46** T1 relaxation plot of water in FBS at pH 7.4 in the absence of  $(\text{Co}[\text{TPTA}])^{2+}$ . The fitting was done using topspin 2.1. The longitudinal relaxation time constants for water proton is found to be 0.894s.

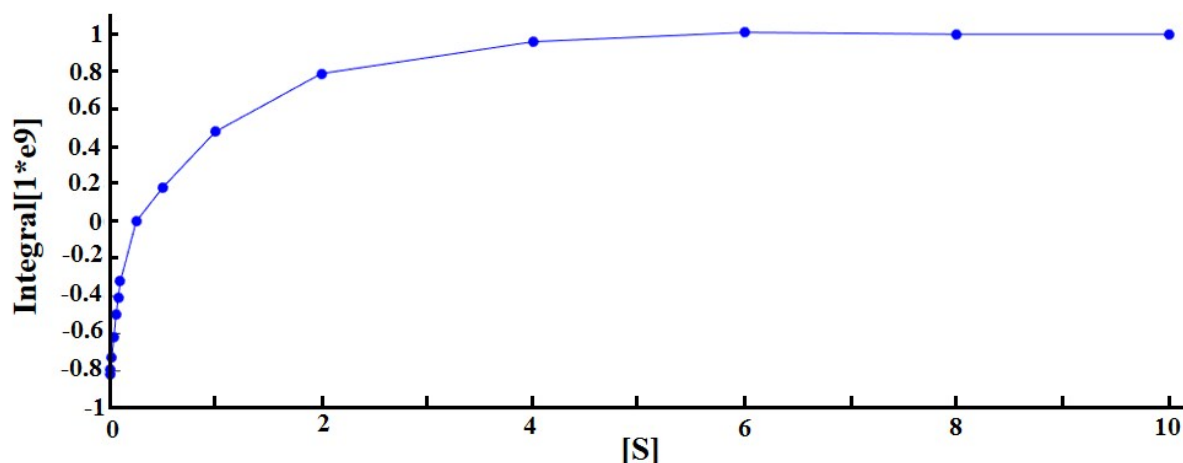

**Fig. S47** T1 relaxation plot of water in FBS in the presence of (Co[TPTA])<sup>2+</sup> at pH 7.4. The fitting was done using topspin 2.1. The longitudinal relaxation time constants for water proton is found to be 0.595s.

Relaxivity calculation:

Relaxivity (R)=  $\frac{1}{c} \left( \frac{1}{T_1'} - \frac{1}{T_1} \right)$  where  $T_1'$  and  $T_1$  are the longitudinal relaxation time constants of water protons in the presence and in absence of (Co[TPTA])<sup>2+</sup> respectively.

$$R = \frac{1}{10} (1.68 - 1.14) = 0.05 \text{ (mM)}^{-1} \text{s}^{-1}$$

**Table S2** Selected Bond Length (Å) and Bond Angles (deg) for [Co(TPTA)]Cl<sub>2</sub>·2H<sub>2</sub>O and [Ni(TPTA)Cl]<sub>2</sub>·Cl<sub>2</sub>·0.5H<sub>2</sub>O.

| [Co(TPTA)]·Cl <sub>2</sub> ·2H <sub>2</sub> O |          | [Ni(TPTA)Cl] <sub>2</sub> ·Cl <sub>2</sub> ·0.5H <sub>2</sub> O |            |
|-----------------------------------------------|----------|-----------------------------------------------------------------|------------|
| Bond Length                                   |          |                                                                 |            |
| Co(1)-N(1)                                    | 2.127(6) | Ni(1)-N(1)                                                      | 2.015(3)   |
| Co(1)-N(2)                                    | 2.256(6) | Ni(1)-N(2)                                                      | 2.220(3)   |
| Co(1)-N(4)                                    | 2.199(6) | Ni(1)-N(4)                                                      | 2.123(3)   |
| Co(1)-N(6)                                    | 2.327(6) | Ni(1)-N(6)                                                      | 2.232(3)   |
| Co(1)-O(1)                                    | 2.231(5) | Ni(1)-O(1)                                                      | 2.083(3)   |
| Co(1)-O(2)                                    | 2.171(5) | Ni(1)-Cl(1)                                                     | 2.3367(9)  |
| Co(1)-O(3)                                    | 2.154(5) |                                                                 |            |
| Bond Angles                                   |          |                                                                 |            |
| N(1)-Co(1)-O(3)                               | 104.5(2) | N(1)-Ni(1)-O(1)                                                 | 171.74(11) |
| N(1)-Co(1)-O(2)                               | 172.9(2) | N(1)-Ni(1)-N(4)                                                 | 91.96(12)  |
| O(3)-Co(1)-O(2)                               | 82.3(2)  | O(1)-Ni(1)-N(4)                                                 | 80.51(11)  |

|                 |           |                  |            |
|-----------------|-----------|------------------|------------|
| N(1)-Co(1)-N(4) | 102.0(2)  | N(1)-Ni(1)-N(2)  | 80.40(12)  |
| O(3)-Co(1)-N(4) | 129.6(2)  | O(1)-Ni(1)-N(2)  | 95.30(12)  |
| O(2)-Co(1)-N(4) | 74.6(2)   | N(4)-Ni(1)-N(2)  | 83.72(11)  |
| N(1)-Co(1)-O(1) | 101.5(2)  | N(1)-Ni(1)-N(6)  | 78.84(11)  |
| O(3)-Co(1)-O(1) | 78.26(18) | O(1)-Ni(1)-N(6)  | 103.42(11) |
| O(2)-Co(1)-O(1) | 77.55(17) | N(4)-Ni(1)-N(6)  | 83.16(10)  |
| N(4)-Co(1)-O(1) | 136.0(2)  | N(2)-Ni(1)-N(6)  | 154.96(11) |
| N(1)-Co(1)-N(2) | 74.4(2)   | N(1)-Ni(1)-Cl(1) | 95.05(9)   |
| O(3)-Co(1)-N(2) | 149.2(2)  | O(1)-Ni(1)-Cl(1) | 92.48(8)   |
| O(2)-Co(1)-N(2) | 98.7(2)   | N(4)-Ni(1)-Cl(1) | 172.98(8)  |
| N(4)-Co(1)-N(2) | 79.4(2)   | N(2)-Ni(1)-Cl(1) | 97.20(8)   |
| O(1)-Co(1)-N(2) | 72.0(2)   | N(6)-Ni(1)-Cl(1) | 98.42(8)   |
| N(1)-Co(1)-N(6) | 73.4(3)   |                  |            |
| O(3)-Co(1)-N(6) | 71.8(2)   |                  |            |
| O(2)-Co(1)-N(6) | 111.3(2)  |                  |            |
| N(4)-Co(1)-N(6) | 76.0(2)   |                  |            |
| O(1)-Co(1)-N(6) | 146.9(2)  |                  |            |
| N(2)-Co(1)-N(6) | 133.8(2)  |                  |            |
